# Supplementary material for: Cyclic Nucleotide Gated Channels 7 and 8 Are Essential for Male Reproductive Fertility
Source: PubMed Central journal article supplement (PMC3570425; doi:10.1371/journal.pone.0055277), 2013-02-12
Supplement: pone.0055277.s003.pdf [file pone.0055277.s003.pdf]

### Figure S3. DNA sequences of plasmid constructs used in this study

Plasmid stock 1300, ACA9promoter::intron-GFP-CNGC7 (genomic DNA), abbreviated as psl300, 9p-i-GFP-CNGC7. The ACA9 promoter with an added intron in the 5' UTR, extends from an SbfI site to SalI, followed by a sequence encoding GFP (green italics). A linker connects GFP to the coding sequence for CNGC7, which starts with the first ATG following an AscI site, in the context of **GGCGCGCCCGGCGGAATG**, and ends with a TGA upstream of a NotI site, in the context of GATTTTGATGCTGAA**TGA**.

```
TTTTTATCCCCGGAAGCCTGTGGATAGAGGGTAGTTATCCACGTGAAACCGCTAATGCCCGCAAAGCCTTGATTCACGG
GGCTTTCCCGCCCGCTCCAAAACTATCCACGTGAAATCGTAAATCAGGGTACGTGAAATCGCTAATCGGAGTACGTGAA
ATCGCTAATAAGGTCACGTGAAATCGCTAATCAAAAAGGCACGTGAGAACGCTAATAGCCCTTCAGATCAACAGCTTGC
AAACACCCCTCGCTCCGGCAAGTAGTTACAGCAAGTAGTATGTTCAATTAGCTTTTCAATTATGAATATATATCAATT
ATTGGTTCGCCCTTGGCTTGTGGACAATGCGCTACGCGCACCGGCTCCGCCCGTGGACAACCGCAAGCGGTTGCCACCGT
CGAGCGCCAGCGCCTTTGCCACAACCCGGCGCCGGCCGCAACAGATCGTTTTATAAATTTTTTTTTTTGAAAAAGAAA
AAGCCCGAAGGGCGCAACCTCTCGGGCTTCTGGATTTCCGATCCCGGAATTAGAGATCCTTGGCAGGATATATTGTGGT
GTAAACGTTATCGATCTGGATTTTAGTACTGGATTTTGGTTTTAGGAATTAGAAATTTTATTGATAGAAGTATTTACAAA
TACAATAACATACTAAGGGTTTCTTATATGCTCAACACATGAGCGAAACCTATAAGAACCCTAATTTCCCTTATCGGGA
AACTACTCACACATTTATTTATGGAGAAAATAGAGAGAGATAGATTTGTAGAGAGAGACTGGTGATTTTCAGCGTACCGAAT
TAATCTCCCGCAGCAGCCGAGCGAGCTTAGCGAAGTGTGGACGAGAACTGTGCCACCAAGCGTAAGGCCGTTCTCTCG
CAATTTGCCCTTGGTAGGCTCGCGCAGTGTGTGGCTTAGGCGCTTCTCGAAATCAGCTCTTGTTCGGTCCGCATCTACTTA
TTCTTTGCCCTCGGACGAGTGTGGGGCTCGGTTTCCACTATCGGCGAGTACTTCTACACAGCCATCGGTCCAGACGG
CCGCGCTTCTGGCGGCATTTGTGTACGCCGACAGTCCCGGCTCCGGATCGGACGATTCGCTCGCATCGACCTCGCC
CAAGCTGCATCTCGAAATGCCGTCACCAAGCTCTGATAGAGTGGTCAAGACCAATGCGGAGCATATACGCCCGGAG
CGCTGGGCATCTCGCAAGCTCCGATGCCCTCCGCTCGAAGTACGCGCTCTCGTCCATACAAGCCAACCGCCCTCC
AGAAGAAGATGTTGGCGACCTCGTATTGGGAATCCCCGAACATCGCCTCGCTCCAGTCAATGACCGCTGTTATCGGGCCA
TTGTCCGTCAGGACATTTGTTGGAGCCGAAATCCGCGTGCACGAGGTGCCGACTTCGGGGCAGTCTCGGCCCAAAGCAT
CAGCTCATCGAGAGCCTGCGCGACGGACGCACTGACGGTGTCTCCATCACAGTTTGCAGTGATACACATGGGGATCAG
CAATCGGCATATGAAATCACCCATGTAGTGTATTGACCCGATCCCTGCGGTCGCAATGGGCCAACCCTCGTCTGG
CTAAGATCGGCCGACGATCGCATCCATAGCCTCCGCGACCGGCTGAAGAACAGCGGGCAGTTCGGTTTCAGGCGAGTTC
TTGCAACCTGACACCCTGTGCACGGCGGGAGATGCAATAGGTCAGGCTCTCGCTGAACCTCCCAATGTCAAGCACTCCG
GAATCGGGAGCGCGCCGATGCAAAAGTCCGATAAAACATAACGATCTTTGTAGAAACCATCGGCGCAGCTATTTACCCGC
AGGACATATCCACCGCTTCTACATCGAAGCTGAAAGCAGGATTTCTCGCCCTCCGAGAGCTGCATCAGCTCGGAGAC
GCTGTGCAACTTTTCGATCAGAACTTCTCGACAGACGTCCGCGTGAAGTTCAGGCTTTTTCATAGGGATCAGCTTGGGCT
GTCTCTCCAAATGAAATGAACCTCTTATATAGAGGAAGGGTCTTGCGAAGGATAGTGGGATGTGCGCTCATCCCTTAC
GTCAGTGGAGATGTCACATCAATCCACTTGTCTTGAAGACGTGGTGGAACTCTCTTTTCCACGATGCTCTCGTGG
GTGGGGTCCATCTTTGGGACCCACTGTCCGCGAGGGCATCTTGAATGATAGCCTTTCCCTTATCGCAATGATGGCATTTG
TAGGAGCCACCTTCTTTTCTACTGTCTTTCGATGAAGTGACAGATAGCTGGGCAATGGAATCCGAGGAGGTTTCCCGA
AATTACCCTTTGTTGAAAAGTCTCAATAGCCCTTTGGTCTTCTGAGACTGTATCTTTGACATTTTGGAGTAGGGGTACG
ATAACATTAACGTTTACAATTTCCGCGCATTCGCCATTCAGGCTGCGCAACTGTTGGGAAGGGCGATCGGTGCGGGCCTC
TTCGCTATTACGCCAGCTTGGCGAAAAGGGGATGTCTGCAAGCGGATTAAGTTGGGTAAACCGCAGGTTTCCCGCAC
GACGTTGTAAAACGACGGCCAGTGAATGTAATACGACTCACTATAGGGCGAATGGGTACCCTGCAGGAAGCTTGAAC
TGAGAAACCATTTGGAAGCAAGAAAGGATCTCAAAACAAAACAGTGTGTATCATTTTCATTTGATGATGGAATCGAATCGA
GTTGTGTTTAGGGTTTCTCTGGGTTAATCTCAGTCTATGTGGGCACATTTTAGTCTTCTACAAATATAAGACACTCTTC
ACTTATTTAGAAGCTCACTCATCAGAAAAGAAAAGAACTTTGCTCAGTCTCTCATCTGTGTGTTGATTTGATTTTTC
AGGCAGAAAACCTTTTTTTGTTCTTGTATTTGATTACAATTAGTAAATATTTAAGACTTAGTAGAGATAATGCAATCTA
TGTATAAAAATAGAAACATGATTTGGTATGTGCTGCAACCCAAAGTACCTTAAATGTCGTACACACGTTTCATCAGGTTAA
AACGAAATTTCTCAGCAACTTCACTATCTCTCTGTACATGTTTATTTCTTTCCATATCTTTATTTGAAAACCTGAT
TAGAAAAGAACTGATTAAGTATGAAGATAATTAGTGTACCATTTCTCATGATACGAGGTGAACAATAGTATGACAGAA
TACTAGAATAATTTATAAGTTATAAAGATGAATGGTATACCACTTATTAACAAAACGAAAACATAGTTAGATCTGAGAAG
AAGGAAAGATTTTGTTTTAAAAAATGAGATGGTATGATATATGCCATGTAAGAGATGCCACCATGTTCTTCTTCTTCT
TCTTACC CGAAAAAATCTTTCTTCTCTTTCCATAAAAAAGAAAACAAAAAATACTTCCCAAAATTTTGGCC
AAACCAACCAAAAATAGTAAATGATGATCTCAATTTGAACCCCTCTCCATTTTCTTTCATAGTTTTTTTTTAGGGTAA
ATCAAAAATATTAATGTTGGTTAGAAAACCAAAAATAGTTTTCTTTTTTTTCTGTGATTGACAGAGAGGTAAGAGAA
AAAAAAGAGAGAAAGTGTTCGGTTTTTGTGGCTTCTCTCGAGTTAGGCCCTTCTCTTCCGTCACACCATCATTTTTT
TTCTCCATAACGACCAATCATAAAACCGGTCGTTCCTATTTTTTTCTTCTGCGTTTTTTGTTTCGAATCTTCAATA
GAATTTTAAAAGAAAGAAAGTGGTGGAGACGAAGGAAGGAAGTCCAGCTGAGTCCACCTTCATATGCTTCT
CTTTTTTCCGAAGAATCTGGTTTCTTCTTGAATATCTCTTCTGTTCTTCTTCTTTTTTCTAAAGTCTCGAATA
TATCTTCATTATCATTACTTTATTTGCTTCTTCCGCGAGTTTTTGTGCAAGTTTTAACGATTTTTTGGTTTTGAAGC
AAGGCACAGAGAAAGGCGCTCGACATGGGACTAGTGATGGTGAAGCAAGGGCGAGGAGCTGTTACCCGGGGTGGTGCCC
ATCCTGGTGCAGCTGACGGCGACGTAACGGCCACAAGTTCAGCGTGTCCGGCGAGGGCGAGGGCGATGCCACCTACGG
CAAGCTGACCCCTGAAGTTCACTCTGCACCCCGGCAAGCTGCCCGTGCCCTGGCCCCACCTCGTGACCCCTTCACTTACG
CGGTGCAGTGTCTCAGCGCTACCCCGACCATGAAGCAGCAGCACTTCTTCAAGTCCGCCATGCCGAAGGCTACGTC
CAGGAGCCACCATCTTCTTCAAGGACGACGGCAACTACAAGACCCGCGCCGAGGTGAAGTTCGAGGGCGACACCCCTGGT
GAACCCGCTCGAGCTGAAGGGCATCGACTTCAAGGAGGACGGCAACATCTGGGGCACAACTGGAGTACAACATGACAACA
GCCACAACGTTATATCATGGCCGACAAGCAGAAGAACCGCATCAAGGTGAACCTTCAAGATCCGCCACAACATCGAGAC
GGCAGGTCGAGCTCGCCGACCACTACCAGCAGAACACCCCAATCGGCGACGGCCCGTGTCTGCTGCCCGACAACCACTA
CCTGAGCACCCAGTCCGCCCTGAGCAAGACCCCAACGAGAAGCGCGATCACATGGTCTGCTGGAGTTCGTGACCCCGC
CCGGGATCACTACGGCATGGACGAGCTGTACAAGGGTCTAGAGGGGGGGCGCGCCCGGCGGAATGATGATGCAGAGAAAC
```



by a sequence encoding FLAG epitope tag (green italics). A linker connects the Flag tag to the coding sequence for *CNGC7* with an F589 to W substitution, which starts with the first ATG following an AscI site, in the context of **GGCGCGCCGGCGGAATC**, and ends with a TGA upstream of a NotI site, in the context of GATTTTATGATGCTGAATGA. The F to W substitution with a silent *NheI* diagnostic site is in the context of GCTAGCCAG**TGG**

TTTTTATCCCGGAAGCCTGTGGATAGAGGGTAGTTATCCACGTGAAACCGCTAATGCCCGCAAAGCCTTGATTCACGGGGCTTCCG  
GCCCGCTCCAAAACACTATCCACGTGAAATCGTAATCAGGGTACGTGAAATCGTAATCGGAGTACGTGAAATCGCTAATAAGGTCAG  
TGAAATCGCTAATCAAAAAGGCACGTGAGAACGCTAATAGCCCTTTCAGATCAACAGCTTGCAAAACACCCCTCGCTCCGGCAAGTAGT  
ACAGCAAGTAGTATGTTCAATTAGCTTTTCAATTATGAATATATATCAATTATTGGTCCCTTGGCTTGTGGACAATCGCTACGC  
GCACCGGCTCCGCGCTCGGACACCGCAAGCGGTGCCACCGCTCGAGCGCCAGCGCCTTGCCCAACACCGCGCGCCGCAACA  
GATCGTTTTATAAATTTTTTTTTTGAAGAAAGAAAAGCCGAAAGGGCGCAACCTCTCGGGCTTCTGGATTTCCGATCCCGGAATTA  
GAGATCTTGGCAGGATATATTGGTGTAACTTATCGATCTGGATTTTAGTACTGGATTTTGGTTTTAGGAATAGAAATTTATTGA  
TAGAAGTATTTACAAATACAAATACATACTAAGGGTTCTTATATGCTCAACACATGAGCGAAACCTATAAGAACCCTAATTTCCCT  
TATCGGAAACTACTCACACATTTATTGGAGAAAATAGAGAGAGATAGATTTGTAGAGAGAGACTGGTATTTACGCGTACCGAATT  
AATCTCCCGGACCGAGCGAGCTTAGCGAACTGTGGACGAACTGTGCCACCAAGCGTAAGGCCGTTCTCTCGCATTTGCCTT  
GCTAGGCTCGCGGAGTTGCTGGCTGAGGCGTTCTCGAAATAGCTCTTGTTCGGTTCGGCATCTACTTATTCCTTTGCCCTCGGACGA  
CTGCTGGGGCGTCCGTTCCACTATCGGCGAGTACTTCTACACAGCCATCGGTCCAGACGGCCGCTTCTCGGGCGGATTTGTGTACG  
CCGACAGTCCGCGTCCGATCGGACCTTTCGTCGGTCCGCTCCGCGCCAGCTGCATCATCGAAATTTACCGCCCTCTACATCGACT  
GATAGAGTTGGTCAAGACCAATCGGAGCATATACGCCCCGAGGCGTGGCGATCCTGCAAGCTCCGGATGCCCTCCGCTCGAAGTAGCGC  
GTCTGCTGCTCCATACAAGCCAACCGCCCTCCAGAAGAAGATGTTGGCGACTCGTATTGGGAATCCCGAACATCGCCTCGCTCCA  
GTCAATGACCGCTGTTATGGCGCCATTTGCTCCGACAGCATGTTGGAGCCGAAATCCGCGTGCACGAGGTGCCGGACTTCGGGGCAGT  
CCTCGGCCAAAGCATCGATCATCGAGCGCTCGCCGACGGAGCATGAGCGGTGCTGCTCCATCACAGTTTCCGAGTACAGGACG  
GGATCAGCAATCGCGCATATGAAATCACGCCATGTAGTGTATTGACCGATTCCTTGGCGTCCGAAATGGGCGCAACCCGCTCGTCTGGCT  
AAGATCGGCCGACGATCGCATCCATAGCCTCCGCGACCGGTGAAGAACAGCGGGGAGTTCCGTTTCAGGCGAGGCTTGCACCGTGA  
CACCCCTGTGCACGGGGGAGATGCAATAGGTCAAGGCTCTCGTGAACCCCCAATGTCAAGCACTCCGGAATCGGGAGCGCGGCCGAT  
GCAAAGTGGCCGATAAACATAACGATCTTTGTAGAAACCATCGGCGCAGCTATTACCCGACAGGACATACACGCCCTCTACATCGAA  
GCTGAAAGCAGGAGATTTCTCGCCCTCCGAGAGCTGCATCAGGTTCGGAGACGCTGTGCAACTTTTCGATCAGAACTTCTCGACAGACG  
TCGCGGTGAGTTTCCGCTTTTTCATAGGGATCAGCTTGGGCTGCTCTCCAAATGAAATGAACTTCCTTATATAGAGGAAGGGTCTTG  
CGAAGGATAGTGGGATTTGTCGTCATCCCTTACGTCAGTGGAGATGTCATCAATCCACTTGTCTTGAAGACGTGGTTGGAACGCTT  
CTTTTTCCACGATGCTCCCTCGTGGTGGGGGTCCTATCTTTGGACCACCTGTCCGCGAGAGGCATCTGAAATGATAGCCCTTCCCTTATCG  
CAATGATGGCATTGTAGGAGCCACTTCTTTTCTACTGCTCTTCGATGAAGTGACAGATAGCTGGGCAATGGAATCCGAGGAGGTT  
TCCCGAAATACCTTTTGTGAAAGTCTCAATAGCCCTTTGCTCTTCTGAGACTGTATCTTTGACATTTTTGGAGTAGGGGTACGATA  
ACATTAACGTTTACAATTTCCGCGCCATTCGCCATTCAGGCTCGGCACTGTTGGGAAGGGCGATCGGTGCGGGCCTCTTCGCTATTACG  
GCAAGTGGCGAAAGGGGATGCTGCAAGGCGATTAAGTTAAGTCAACGCGAGGTTTCCAGTCAAGGATTTCCGAGTACAGGACCGCCCA  
GTGAATTTGAATACGACTCACTATAGGGCGAATTTGGTACCGTTTAAACAAGCTTCCAGCCCTGCAGGGATCCTGGGTTTTGTATCT  
AAAGATCAAAAGGATAACATTTTGGGAGATGAGAACTTCAAAGATGCGATTTAGTTTTTGTGAAAGTGGGGAATTTAATTCGAT  
TGACGTTAGGAACTTTTCTCTATGGATTCTTTGGGTTTTGTGATTAATGGCATTGAAGGTACAAAGGAAAAGGTTTGGCCAACAAAATC  
AAGAACCACAAAGAGAGAGAGAGGAAACACACAGACAAAACATATGAAAGAATGATTAAGATAACTGCCACAAATATAACTGCAA  
AATAACATACTCCTTAAGAAAATAGTGGGCGCTTCTTTGTTATGGAAGAATGTGCAAACTTTTTATATGGTTAAGTATATAGTATT  
ATTATATCAAAATTCATTTTGTACTATATATAGGTGATTTGTGTCGAAATTCACGTAAGATCTTTGTAACATTTTTTCACACTAGTTAAT  
TTTACATGTATTTAGATTTGCTGCAAAAAAAAAAAAAAAAAAAAAAAAAAGAAAATAGAAAAATTTCTGTTTTTTTTCACACTAGGCCGATTT  
GATTTGATCAAAACCGATTTTAAAAGCTTAAACTAATAAATCGATTTTCAATCCCAATTTTAAAATAGATCGTTTTGGAGGTTCAAG  
AATATCTGGTCCGCTGTTAAGACGATATTTGAACTTTGAACCGTTGAACTATATATACTAGGTATATTTACTGTATGTTGTGAAAGG  
GTTTACTATCACATGGCTATTATATAAGACCGTACTAACATATGCAATATTTATGTTGATCAAAGTACCACAAATTTTGGTGAAGC  
AAAAACAAAAGGTTAGAGATGAAAAATATGCATGTAATAAATAAAGAGATGAAAGAAATATTAATGGGAGATGGGTGGGAAATGAA  
TAGATTTGGTGTCTCTGCTCACTTTTACTTTTTTTTTTTTATTTGTTGTTGATAGTACCAAGAGATTTCTCTTACTTCTTCGTA  
TGGTTTTATTTAGGGTATATTACGTGACCTGTAGTTCATCCTCTCCAACCTCTCAAACCCACAATTTATTCATATACATATATCCAAAG  
ATTATTTTATCAAAGATATGACTAAAAATCTCTATACAGTGTGTATGTAATAGAAAGGTGCAAGGATTTTGGTGTGGCACCACCTTCA  
AGACTTTTTTTTTTATCAAGACCTAACTCTTACCCTTTGAAAGCAGCTTATCTTATTTCTTTAGATAAAAAACAATTTGATAAGCGAGTGTCT  
TTAACTTCACAAAACATAACTACTTTTTTATTCGATAAAAAACAAAGATTTTATAGTCTTTTTTCATTAGGGTCCCAATGATTAATA  
TGTTACAGTACAGAAATTTCTTCTTGGTCCCGTAAGCATTTATTAATCAAACAAAAGGAAATTTGTTGCTTCTCAATAGGAA  
GTGGAAACCTTTGCCATTTCAATAATGTTTTAAATCTTTTTTTTTTCTTCTAATGTGTGTTTCATAAACACCAGCGACTTTATTGAA  
AAGAGGAACACGTAATTTGATTTCTCAAAGAACAAATTTTTTGAAGAGAGTAACATTTGTTTTCTTATCTTAATATAAGCAACGAAAT  
CAATCGTGCATATAAAAGTGAATGCTATTTGAATTTCTAACTTGACTAGCAAAATTTTCACTAAAAATAAAATAAAAAGTAAACG  
ATAAAGTAGTTGCTAGTATGCTACTCCACATGAATAAAATAATAAAGTAAATCAATAGAAATGTAATCTCTTAATTAATCATCTAAT  
TATATAATCACAGTGGCAAAGTGAATAAAAAAAAAAAGAGGAGAATTTGGATCCCGTCCGATTTCTATATTTAAAGATCGCTAAACATCTC  
AAATCTGCCACAGTGGTCATACTTAATAGCAGCCATTAACGAAGTAATAAATTAGTCGATAATAATGTTTAAACCAACATCGTATTTCT  
AGATCCATGAATTAGTTGGAGTAATTAACATCATTTGTTCTTAATACGTTTAAACAAGCATAAGAAAAACAATTTGTACATATGTTA  
GTATAAGTTAATCAATCAATTTAATAAAGCTTGTATTAATTTTTTATTTGAAATTTACTACTTTTGTGTCTATTCGAAATGATGGAG  
TACTAAAAATTTGAAGACTAAAAACGTCATTTATGTTAGAGAAAACAATACGCATAAGTGTGATTTTTTGAAGTGGAAAAGTTAGT  
ATGTCCTCTATATGATATGATGGAAGTTGTTGTTCTTTTTGTTGGATAAACATCATTTTTCCGTCAGCTAATTTTTAATTTACGAT  
TCATTTTATTTCTCACTTCTTATTTATCCCTTTTATATTCGATATAATGTTTCTAAGGATTTCTATCCCTTTTTGTTATTTTATAGG  
TACACTATCTTATGAGTGTCAACAAGCATGTACACTATCTCCCATACCACATATTGTCAACAGATTTTGGTACAGAAATTTGGTACCGG  
ATATACTTTAATAGTACATAACAACAACAAATGAATTTATGTAAGCAATTTGTTAACTGATGTCAAAACCGAAATACTACAAAAGA  
CAGTATAATGAAATACCGGTTAATGTGTTGACAAAATATAATAAATGTAGCTCATAAACTTCAATAATTCACTTAAATAAATCTTA  
ATGAACCTCATAACGAATTAGATATTTAACTAATCTATCATGGTTTTACGAATTAATATAATTTTTTTTTTTATCTTTGAAACAAT  
TGAACATAACAATATAAACCAGGACTTTAAGTTAAACTACTAAAAACATATTAGTTTTATCAATAGAAATGATCAAGAAATTTGATA  
CATTATAATGTGAATTTTAAATCCTAAAGCATATATAGTATATATCCCTTTGATTTTCATAGAAAAAAGTAGAAAAAATAACTAT  
TGGCCGATCTATAACTATTGGCCGGTGGGTCCAACAACATAAGAACAGTAGATATTGTGTCGATTGAAGTTTTGAGATGCAAAACGTTG

TGCTGTTTTGAGAACACAAAAACAGCATAAACAAACGAGACCCGCAACTATAACATTCGGTAAATACCCCTCATTCTCCCATCATATTTT  
CAAAAACACCCTTCCCCCTATTTCCATGGCCCTTCTCTAGTTTTCCCGCGAGAAAATCCTCTCCTTCCATAATCATCAAAAACAA  
AATGCAAAACCCAAAAACAAAAATCACACGACGCAACCCAGCTCTGTCCATCAATCTCAATCTCTGTGTAAATGC  
GGAATCCGATTTAACACCGGAATCCGCCATGGAAGGGAGCGGTGTGCGAGGTGCAGTAGTCCACCTTCACTTGTCTCTTTTTTCCGAA  
GAATCTGGTTCGTTTCTTTGAATTAATCTCTTCTCTGTTCTTCTTTTTCTAAAGTCTCGAATATATCTTATTATCATTACTTT  
ATTTGCTTCGTTTCTCCGAGTTTGTGCAAAGTTTTAACGATTTTTGGTTTTGAACGAAGGCACAGAGAGAAGGCCGCTGCACATCG  
ACTACAAAGACGATGACGACAAGGTCGACGGCGCGCGGCGGAATGATGATGCAGAGAACTGTTTTGGATTAACTAAAGAACCCGA  
GGAGGTGAAAAGAAAGAAAGCATCCAAATCTTTTCCAGGAAAGGAGTTAAAAAATCAGATCAGAAGGTCTAATAACCATCGGTAATCCGT  
TACAGAGCGGTTTTTCCAGAAGACTTAAGAATAACAGAGAAGAAAATCTTTGATCCTCAAGACAAAACACTTCTCGTATGGAACAGAT  
TGTTCTGTCATTTCTGTTATTTAGCTGTCTCTGTTGATCCTTTGTTCTTCTATCTTCCCATTTGTCGATAATCCGGAAGCAGCTGTATA  
GGATTGATCAAACTAGCTGTTTACAACGACACTCTAGAACCATTTGTTGACGTTTTTACTTAAGTAAAGTGGCTTCTCAGTTTTCG  
TACAGCTTATATAGAGATCTTCTCTCGTGTGTTTGGTGTGTTGAGTGTGATGATCCTGCAAGATCGCTGAACCAATTTAACCC  
GTTATTTCTGTCGATTTTCTTGCAGTGTGCTTTTACCAGGTAACAGAGTAAAAGATCCTTTGATGGTTACTAAAAATATTG  
GACTTTTGGGATGATTATGATGTTTTGTGTGATATACAGATGTCAGTGTGGAAGTTTCTTACGGGTCTAAAGGATCGGATGTGTT  
ACCAACGAAAACGGCATTTGTAACATTTGTAATTTGTCAGTATATCCGAGATTCGTGAGGTTTTATCCGTTAACATCAGAGTTGAAG  
AAACTGCAGGAGCTTTTCCGAAGGAGCTTGGCTGGTGTGTTATTTATCTTCTCTGTTATATGCTTTCAGGATGATGCTTGAAGCCACGTAAGCTTTCT  
ATGTATATATGACTCTTCTAATTAGTGTTTGAGACATTTATCATATTGGTCACTTCTGACTTTACAACACATTTTGACAGATA  
ACTGGAGCGTTTTGGTACATGTTGTCAGTGGAGCGTAACGATACTTGTGGAGATTTGCGTGTAAAGTTTCCAGCAGATCCGCGACTCTG  
TGTTGATTTCTGATTTGTTGGGACTAAATTTGAGCAGTGGAGAACTGAATGGATCAAAACAGTCCCTGAGCTTCTTAAGAGCAAT  
TTCTGCTTAAAGAGATCTTCAAGTTTAACTATGGGATGACCGTGAATGAGTATATCTTCCAGCAGTATATCTTCCAGCAGTATGCTTGAAGCCACGTAAGCTTTTCT  
TCCAAGTTCTGTTATTGCTATGGTGGGCTTCAAAATCTCAGGTAAGCGGGGGCAACTCATTGTCATTGGTTCAACCGATAGCTTG  
TGAGAGTACTCTTGACATCTTTGGTGTTTTCAATGAACAGCAGTTAGTTCAGGGGCTGCAGACAAGTACATTTCCAGGAGAGGTTTTG  
TTTTCCATTGCGATGATAGCTGGGCTTCTTCTTTCCGCTTCTCATCGGGAATATGCAGACTTATCTTCACTACTTACTGTTCTG  
TCTCGAGGAAATGAGGATCAAAAAGAGCTGACTCAGAACAGTACACAGTCACTTCCACAAAATTTGAGGGAAGAGTACAGC  
GCTATGATCAATACAAAATGGTTAGAGACAAGAGGTGTAGACGAAGAAAACATAGTTCCAGAGTTTACCCTAAGGATCTCAGAAGAGACATC  
AAACGCCATCTCTGTCTGAATTTAGTTAGGAGGGTAAGTTTTCAATCAGAAATGCTAAAATGCTTGAAGATACTAATACTATGTT  
TCTGTTTACAGGTTCTCTGTTTGTGTAATGATGAAAGTACTTGCAGCAATCTGTGAGAGATTAAGCCGAGTCTTTTACCGG  
AAAGCACTTACATTTGTGCGTGAAGGACCCCTTAAAGCAATGATGTTTATAATCCGAGGCGGTTAGAAAATGAGGAAAGG  
GGAAGAAGCGGTTTTCTTCAACAGAGGGTTGTTAAAAGAAGGAGACTTTTGTGGTGAAGAGCTTCTGACATGGGCTTCTGACCTAAAGC  
AGGCTCAAACTTACCTTCTCCACAAGAACAGTGAAGGCTCTGACTGAAGTAGAGGCTTTCGCTCTTGAAGCTGAAGAGCTGAAGTTTG  
TAGCTAGCCAGTGGAGAGACTTCATAGTCGACAGGTTCAACAAACATTTAGGTTTTACTCTCAGCAATGGAGAACTTGGGCTTCTTGC  
TTCACTCAAGCTGCTTGGCTCGCTATTTCAAGAAGGAAAACAGCTGAAATGAGACGGATTGAAGAAAAGAAAGAAATTTGGTATGA  
AGATGAATATGATGATGAGAGTACAAGAGGCTATGGTTATCAAGAAGTGAATCTTCTTAGACTGCGTTCAACGATATTTGCAAT  
CAAGATTTGCTGCTAATGCATGAAAGGGCACAGACTTAGGAGCTCAGAGAGTTCAAAAGACCTTGATAAATCTGCAAAAGCTCCGGA  
CCTGATTTTGTATGCTGAAATGAGGCTTAGGCTAGGCTACTAGTGAATTCGCGGCGCGGGGCGGGCTGGAGCCACCCGCA  
TTTCGAAAATGAGGAGCTTCCAGCTTCCCGATCGTTCAACATTTTGGCAATTAAGTTTCTTAAAGATTTGCTTGGCGGCTTGGG  
ATGATATCATATAAATTTCTGTTGAATACGTTAAGCATGTAATAATTAACATGTAATGCATGACGTTATTTATGAGATGGGTTTTTAT  
GATTAGAGTCCCGCAATATACATTTAATACGCGATAGAAAACAAAATATAGCGCGCAAACTAGGATAAAATATCGCGCGCGGTGTCAT  
CTATGTTACTAGATCGGGAATTCAGCTTTTGTCCCTTAGTGGGGTAAATCCGAGCTTGGCGTAACTGGTCAATAGTGTGTTCTCT  
GTGTGAAATGTTTATCCGCTCAAAATCCACAACAATCAGGATAACAGCTGAAATGAGACGATTAAGAGTGAAGGCTGGGTTAGTGTGAGT  
AACTCACATTAATGCGTTGCGCTCACTGCCCCCTTCCAGTCGGGAAACCTGTCTGCCAGCTGCATTAATGAATCGGCCAACCGCGG  
GGGAGAGCGGTTTGCCTATTGGGCGCTTCCGCTTCTCGCTCACTGACTCGCTGCGCTCGGCTCGGCTCGGCTCGCGCGAGCGGTATC  
AGCTCACTCAAAGGCGGTAATACGGTTATCCACAGAAATCAGGGGATAACGCAGGAAAGAAATGAAGGCTTGCAGGATATATTTGGCG  
GGTAAACTAAGTCTGCTGTATGTTGTTGAGATCTCATGTGAGCAAAAGGCCAGCAAAAGGCCGAAAGGCTTAAAGGCGCGTGTG  
CTGGCGTTTTTCCATAGGCTCCGCCCCCTGACGAGCATCACAAAATCAGCCTCAAGTCAGAGGTGGCGAAACCCGACAGGACTATA  
AAGATACAGGCGTTTCCCGCTGGAAGCTCCCTCGTGCCTCTCTGTTCCGACCTGCCGCTTACCGGATACCTGTCCGCTTCTCTCC  
CTTCCGGAAAGCGTGGCGCTTCTCATAGCTCAAGCTGTAGGTTATCTAGTTCGGTGTAGGTCGTTCCGCTCAAGCTGGGCTGTGTGCAC  
GAACCCCGCTCAGCTCAGCCAGCCGCTGCGCTTATCCGTAACATCTGCTTGGTGTGAGTCCAAACCGGTAAGACAGCACTTATCCGACTGGC  
AGCAGCCACTGGTAACAGGATTAGCAGAGCGAGGTATGATGGCGGTGTACAGAGTTCTTGAAGTGGTGGCTAACTACGGCTACACTA  
GAAGAACAGTATTTGGTATCTGCGCTCTGCTGAAGCCAGTTACCTTCCGAAGAGAGTTGGTAGCTCTTGATCCGGCAACAAACCACC  
GCTGGTAGCGGTTGGTTTTTTGTTTGAAGCAGCAGATACCGCGCAAAAAAGGATCTCAAGAAGATCCTTTGATCTTTTACCGGG  
GTCTGACGCTCAGTGGAAACGAAAACACTCAGTTAAGGATTTTTGGTCAATGAGATTAATAAAAAGGATCTTCACTAGATCTTTTAAAT  
AAAAATGAAAGTTTTAAATCAATCTAAAGTATAATGTGTAACATTTGGTCTAGTGAATGAAAAAACTCATCGACATCAAAATGAAACTGC  
AATTTATTCATATCAGGATTAATCAATACCATAATTTTGAAGGCGGTTTCTGTAATGAAGGAGAAAACCTCAGGAGGAGTCCATAG  
GATGGCAAGATCTGGTATCGGCTGCGATTTCCGACTCGTCCAACTCAATCAACCTATTAATTTCCCTCGTCAAAAATAAGGTTAT  
CAAGTGAGAAATCACCATGAGTACACTGAAATCCGTTGAGAAATGGCAAAAGTTTATGATTTCTTCCAGACTGTTCAACAGGCCAG  
CCATTACCTCGTCACTCAAAATCACTCGCATCAACCAACCAATTTATTCATCTGATTGCGCCTGAGCGAGACGAAATACCGGCTCGT  
GTTAAAAGGACAATTACAACAGGAATCGAATGCAACCGCGCAGGAACACTGCCAGCGCATCAACAATTTTTACCTGAATCAGGAT  
ATCTTTCTAATACCTGGAATGCTGTTTTCCCTGGGATCGCAGTGGTGAATACCATGCATCATCAGGAGTACGGATAAAAATGCTTGTATG  
TCGGAAAGAGCATAAATTCGTCAGCCAGTTTAGTCTGACCATCTCATCTGTAACAACATTTGGCAACGCTACCTTTGCCATGTTTCCAG  
AAACAACCTTGGCGCATCGGGCTTCCCATCAATCGGTGATGTTGTCGACCTGATTGCCCCGACATTTCCGCGAGCCCATTTATACCCAT  
ATAAATCAGCATCCATGTTGAAATTTAATCGCGGCTTGGCAAGAGCTTTCCCGTTGAATATGGCTCATAACACCCCTTGTATTACTG  
TTTATGTAAGCAGACAGTTTTATGTTTATGATGATATATTTTATCTTGTGCAATGTAACATCAGAGATTTTGGAGACACAAGTGGCT  
TTGTTGAATAAATCGAATTTTGTGAGTTGAAGGATCAGATCAGCATCTTCCCGACAACCGAGCCGTTCCGTGGCAAGCAAAAGT  
TCAAAATCACAACCTGGTCCCTCAACAACCTCTCATCAACCGTGGCTCCCTCACTTTTCTGGATGATGTTGGGCGATTCAGGGC  
ATCCCCATCAACAGCCCGCGCTGAGCGGGCT

Plasmid stock 1685, CNGC18promoter::intron-Flag-CNGC8(F624W) (cDNA), abbreviated as ps1685, 18p-i-Flag-CNGC8(F624W). The CNGC18 promoter with an added intron in the 5' UTR, extends from an SbfI site to the first SalI site, followed by a sequence encoding Flag epitope tag (green italics). A linker connects the Flag tag to the

coding sequence for *CNGC8* with an F624 to W substitution, which starts with the first ATG following an AscI site, in the context of **GGC**CGCGCC**CGGCGGAATG**, and ends with a TGA upstream of a NotI site, in the context of ACAGATGACTTGA**ACTGA**. The F to W substitution with a silent NheI diagnostic site is in the context of GCTAGCCAG**TGG**.

TTTTTATCCCCGGAAGCCTGTGGATAGAGGGTAGTTATCCACGTGAAACCGCTAATGCCCGCAAAGCCTTGATTACAGGGGCTTCCG  
GCCCGCTCCAAAACCTATCCACGTGAAATCGCTAATCAGGGTACGTGAAATCGCTAATCGGAGTACGTGAAATCGCTAATAAGGTACAG  
TGAATCGCTAATCAAAAAGGCACGTGAGAACGCTAATAGCCCTTTCAGATCAACAGCTTGCAAAACCCCTCGCTCCGGCAAGTAGTT  
ACAGCAAGTAGTATGTTCAATTAGCTTTTCAATTATGAATATATATCAATTATTGGTCGCCCTTGGCTTGTGGACAATGCCGTACGC  
GCACCGGCTCCGCCGTGGACAACCGCAAGCGGTTGCCACCCTCGAGCGCCAGCGCTTTGCCACAACCCGGCGCCGGCCGCAACA  
GATCGTTTTATAAATTTTTTTTTTTGAAAAAGAAAAAGCCCGAAAGCGGCAACCTCTCGGGCTTCTGGATTCCCGATCCCGGAATTA  
GAGATCTGGCAGGATATATTGGTGTAACTTATCGATCTGGATTTTAGTACTGGATTTGGTTTTAGGAATAGAAATTTATTGA  
TAGAAGTATTTTACAAATACAAATACATACTAAGGGTTTCTTATATGCTCAACACATGAGCGAAACCCATAAAGAACCTAATTTCCCT  
TATCGGGAACTACTCACACATATTTTATGGAGAAAATAGAGAGAGATAGATTTGTAGAGAGAGACTGGTATTTCAGCGTACCGAATT  
AATTTCTCCCGCAGCCAGCCGAGCGAGCTTAGCGAACTGTGGACGAGAAGCTGTGCCACCAAGCGTAAGCCGTTCTCTCGCATTGCTT  
GCTAGGCTCGCGCAGTGTCTGGCTGAGGCGTTCTCGAAATCAGCTCTTGTTCGGTCCGCATCTACTCTATTCCTTTGCCCTCGGACGA  
GTGCTGGGCGCAGCGGAGACTCAATCGCGAGTACTCTACACAGCCATCCCGAATGTCAGGCTCCAGACGCGCGCTTCTCGGGGATTTGTACG  
CCCGACAGTCCCGGCTCCGGATCGGACGATTGCGTCCGATCGACCCTGCGCCCAAGCTGCATCATCGAAATTTGCCGTCAACCAAGCTCT  
GATAGAGTTGGTCAAGCAATGCGGAGCATATACGCCCGGAGGCGTGGCGATCCTGCAAGCTCCGGATGCCTCCGCTCGAAGTAGCCG  
GTCTGTCTCCATACAAGCAACACGGCCTCCAGAAGAAGATGTTGGCGACTCGTATTGGGAATCCCGAACCTCGCTCGTCCGTTCA  
GCTAATCCCGCTGTTTATGCGGCCATTGTCGTCAGGACATTTGTCAGCCGAAATCCGCGTGCACGAGGTGGCGGACTTCCGGCTCAGT  
CCTCGGCCCAAAGCATCAGCTCATCGAGAGCTGCGCGACGGACGACTGACGGTGTCTCCATCACAGTTTGGCAGTGATACACATGG  
GGATCAGCAATCCGCGCATATGAAATCAGCCATGTAGTGTATTGACCGATTCTTGGCGTCCGAATGGGCGCAACCCCTCGTCTGGCT  
AAGATCGGCGCAGCGATCGCATCCATAGCCTCCGCGACCGGCTGAAGAACAGCGGGCAGTTCCGTTTTCAGGCAGGCTTGCACCGTGA  
CACCTGTGCGCCGCGGAGACTCAATAGGCTAGGCTCTACACAGCCATCCCGAATGTCAGGCTCCGGAATCGGGAATCGGCGGCGGAT  
GCAAAAGTCCGATAAACATAACGATCTTTGTAGAAACCATCGGCGCAGCTATTTACCCGAGGACATATCCACGCCCTCTACATCGAA  
GCTGAAAGCAGGAGATTCTCGCCCTCCGAGAGCTGCATCAGGTCCGAGACGCTGTGCAACTTTTCGATCAGAACTTCTCGACAGAGC  
TCGCGGTGAGTTCAGGCTTTTTCATAGGGATCAGCTTGGGCTGTCTCTCCAAATGAAATGAACTTCTTATATAGAGGAAGGGTCTTG  
CGAAGGATAGTGGGATTTGTCGCTATCCCTTACGTCAGTGGAGATGTACATCAATCCACTTGTCTTTGAAGACGTGGTGTGAACGCTT  
CTTTTCCACGATGCTCTCGTGGGTGGGGTCCATCTTTGGGACCCTGTCCGCGAGAGGCATCTTGAATGATAGCCTTTCCCTTATCG  
CAATGATGGCATTTGTAGGAGCCACTTCTCTTCTACTGTCTTTCGATGAAAGTACAGATAGCTGGGCAATGGAATCCGAGGAGGTT  
TCCCGAAATTACCCTTTGTTGAAAAGTCTCAATAGCCCTTGGTCTTCTGAGACTGTATCTTTGACATTTTGGAGTAGGGTACGATA  
ACATTAACGTTTTACAATTTGTCGCCATTCGCCATTCAGGCTGCGCAACTTTGGGAAGGGCGCATCGGTGCGGCCCTCTCGTATACG  
CCAGCTGGCGAAAGGGGATGTGCTGCAAGGCGATTAAGTTGGGTAACGCCAGGTTTTCCAGTACAGCGTTGTAACACGACGGCCA  
GTGAATGTAATACGACACTATAGGCGAATGGGTACCGTTAAACAAGCTTCCTAGCCCTGCAGGGGATCCTGGGTTTTGTATCT  
AAAGATCAAAGGAATAACATTTTGGGAGATGAGAACTTCAAAGATGCGATTTAGTTTTGTGGAAAAGTGGGGAATTAATTCGAT  
TGACGTTAGGAACTTTTTCTCTATGGATTCTTTGGGTTTGTGATTAATGGCATGAAAGGTACAAGGAAAAGGTTTGGCCAAACAAAATC  
AAGAACCACAAAGAGAGAGAGAGAGAGGAAACACACAGACAAAACATATGAAAGATGATTAAGATAACTGCCACAAATATAACTGCAA  
AATAACATACTCCTTAAGAAAATAGTGGGCGCTCTTTGTTATGGAAGAATGTGCAATCTTTTTATATGGTTAAGTATATAGTATT  
ATTATATCAAAATTCATTTTACTATATATAGGTGATTTGTGTCGAAATTCACGTAAGATCTTTGTAACATTTTTCACACTAGTTAAT  
TTTACATGTATTATAGATTGCTGCAAAAAAAAAAAAAAAAAAAAAAAAAAGAAAATAGAAAATTTCTGTTTTTTCACACTAGGCCGATTT  
GATTGATCAAAACCGATTTTAAAAGCTTAAACTAATAAATCGATTTTCAATCCCAATTTATTTAAAATAGATCGTTTTGGAGGTTCAAG  
AATATCTGGTCCGCTGTTTAAAGACGATATTTGAACTTTGAACCGTTGAAACTATATATACTAGGTATATTTACTGTATGTTGTGAAAGG  
GTTTACTATACATAGGCTATTATATAAGACGCTACTAATATGCAATATATATGTTGATCAAAGTACCAAAATTTTGTAGTGAACC  
AAAAACAAAAGGTTAGAGATAGAAAATATGCAATGTAAAAATATAAAGAGATGAAAGAAAATATAAAGGAGATGGGTGGAAATGAA  
TAGATTGGTGTCTTCTGCTACTTTTACTTTTTTTTTTTTTTTTATGTTTGTGTTGATAGTACCAAGAGATTTCTCTATTCTATTCTTCTGTA  
TGGTTTTATTTAGGGTATATTACGTGACCTGTAGTTCATCCTCTCCAACCTCAAACCCACAAATTTTACTATACATATATCCAAAG  
ATTATTTATTCAAAGATATGACTAAAAATCTCTATACACGTGTGTATGTAATAGAAAGGTGCAAGGATTTTGGTGTGGCACCACCTTCA  
AGACTTTTTTTTTTATCAAGACCTAATCTTACCCTTTGAAAGCAGCTTATCTTATTTTCTTTAGATAAAAACAAATTTGATAGCGAGTGT  
TTAAACTTCACAAAACATACTACTTTTATTCGATAAAAACAAAAGATTTTATTAGTCTTTTTCATTAGGTTCCCAAATGATTAATA  
TGTTACGATACGAAATTTCTTCTGGTCCCGTAAGCATTATATTAATCAAAACAAAAGGAAATTTGTGCTTCTTACAATGGGAA  
GTGGGAACCTTTGCCATCTTCAAAATGTTTTAAATCTTTTTTTTTTCTTTCTAATGTGTGTTTCATAAACACCAGCGACTTTATTGAA  
AAGAGAACACGTAATTTGATTTCTCAAAGAACAAATTTTTTAGGAAGAGTAACATTTGTTTTCTTATCTTAATATAAGCAACGAAAT  
CAATCGTCATATAAAAGTGAAATGCTATTTTGAATTTCTAAACTTGACTAGCAAAATTTTCAATAAAAAATAAAATTAAGGTAACG  
ATAAAGTAGTTGTCGTATAGTCTACTCCACATGAATAAAATAATAAAGTAAATCAATAGAAATGTAATCTCTTAATTAATCATACTTAT  
TATATAATCACAGTGGCAAGTGGAAATAAAAAAAAAAAGAGGAGAATTTGGATCCCGTCCGATTTCTATATTTAAAGATCGCTAAACATCTC  
AAATCTGCCACAGTGGTCACTACTTAAATAGCAGCCATTAACAGAGTAATAAATAGTTCGATAATAATGTTTAAACACATCGTATTTCT  
AGATCCATGAATTTAGTTGGAGTAAATTAACATCTTGTCTTAAATTAAGTTTAAACAGCATAGAGAAAACAAATTTGTCACATATGTTA  
GTATAAGTTATCATAATCATTTATAAAAGCTTGTATTAAATTTTTTATATTGAAATTTACTACTTTGTGCTAATCGGAAAATGATGGAG  
TACTAAAATTTGAAAGACTAAAATACGTCATTATGTTAGAGAAAACAAATACGCATAAAGTGTGATTTTTTGGAAAGTGGAAAAGTTAGT  
ATGTCCTCTATATGATATGATGGAAGTTGTTGTTCTTTTTGTGTTGATAAACATCATTTTTCCGTCAGCTAATTTTTAATTTTCAGTAT  
TCATTTTTATTTACTCCTTCTATTTAATTCCTTTATTCGATATTCGATAATTTGTTTCAAGGATTTCTATTTCCCTTTTATTTTATAGG  
TACACTATCTTATGGATGGTGTCAACAAGCATGTACACTATCTCCACTACCACATATGTCACAGAATGTTTGGTACGCGTGTCTCT  
ATATACTTTAATAGTACATAACAACAACAAATGAATATGTAAGACAAATTTGTTAAACTGATGTCAAAAACGGAAATACTACAAAAGA  
CAGTATAATGAATACGGGTTTAAATGTTGTGACAAAATATAAATAAATGTAAGTTCATAAAACCTCAATAATTTCACTTAAATAAATCTTA  
ATGAACCTCAAAACGAATAGATATTTTAACTAATCTTATCGTGGTTTTACGAAATTAATATAAATTTTTTTTTTTTTTTTGAACAAAT  
TGAACATAACAATATAAACCAGACTTTAAGTTAAACTACTAAAACATTTATAGTTTATCAATAGAAATGATCATAGCAATTTGTATA  
CATTATAATGTGAATTTTAAAATCCTAAAGCATATATAGTATATATCCCTTTGATTTTCATAGAAAAAAGTAGAAAAAATAACTAT

TGGGCCGATCTATAACTATTGGCCGGTGGGTCCAACAACCTAAGAACAGTAGATATTGTGTCGATTGAAGTTTTGAGATGCAAAACGTTG  
TGCTGTTTTGAGAACCAAAAAACAGCATAAACAACAGAGACCCGCAACTATAACATTCCGTAATAACCCCTATTCTCCCATCATATTTT  
CAAAAACFACCCTTCCCTTATTTCCATGGCCCTTCTCTAGTTTCCGCGAGAAAATCCTCTCCTTCTCCATAATCATCAAAAACA  
AATGCAAAAACCCAAAAAACAATAATCACACGACGCAACCACCTAGCCTCTCTGTCCATCAATCTCAATCTCTCTGTGTTAATGC  
GGATCCGATTTAACACCGGAATCCGCCATGGAAGGGAGGCGGTGTGAGGTCAGTAGTCCACCTTCACTTGTCTCTTTTTTCCGAA  
GAATCTGGTTCGTTTCTCTTGAATTAATCTCTTCTCTGTCTCTCTCTTTTTTCTAAAGTCTCGAATATATCTTCAATATCACTACTTT  
ATTTGCTTCGTTTCTCCGAGTTTGTGCAAGTTTTAACGATTTTTGGTTTTGAACGAAGGCACAGAGAGAAGGCGCGTGCACATGG  
**ACTACAAAGACCGATGACGACAAG**GTCGAC**GGCGCGCC**CGGCGGAATGTCATCTAATGTCACGGGAATGAAGAAGCGATCATGTTTTGGA  
TTGTTTAAACGTAACTAGTCGTGGAGGAGAAAGACAAAAGACACATCAAAATCATTTCGAGAAGGTGTTAAAATCGGATCAGAGGGTCT  
AAAAACGATCGGAAAATCATTCACATCAGGTGTAACAGAGCTGTTTTCCCTGAAGATCTAAGAGTCTCCGAGAAGAAAATCTTTGATC  
CTCAAGCAAAAACCTTTTATTATGGAACAGAAATGTTTGTATCTCTTGCATTCTTGTCTCTCTGTTGATCCTCTGTTCTTCTATCTC  
CCTATTGTCGATAACCTCAAAGACTGCATTGGGATTGACTGTCTAAATTTAGGGTGCACAACTACTCTTAAGAACGATCATCGATGTTTT  
TTATCTTACACGAATGGCTCTTCAAGTCCGTCACGCTTACATTGCTCTCTCTCTGTCGTTGGAAGAGGTGAGCTTGTGATCGACC  
CTGCAAAAGATCGTGAACGGTATTTGACTCGTTATTTCAATTGTCGATTTCTCTCGCGGTTCTTCTCTTACCTCAGATTGCTGTGTGGAAG  
TTCTTCCAGGATCTAAAGGAACAGATGTATTACCAAAAACAGGCGCTATTACACATTGTCATCACACAGTACATAACAGATTCGT  
TAGGTTTTATTCCATTAAGCTTACAGATCAAGAAAACAGCAGGAGCTTTCGCTGAAGGTGCTTGGGCTGGTCTTATACCTCTCT  
GGTATATGCTTGAAGTACATAACTGGAGCGTCTGGTACATGTTGTCAGTGAACGTAACGATACATGCTTGAGATCCGCTTGTA  
GTCCAGCCTGATCCCAAGGTCTGTGTTTCAAGTCTTTTATGTTGGCAGCAAAATTAATGAGCAGTCGCGAAACCGACTGGATCAAAATCAGT  
CCCTGATCTTTTTAAGAACAATTTCTGCTAAAAGCGATGAGTCTAAATGCAACTACGGATCTATAGCCAGGCTGTGCTTCCGGTA  
TTGATTTCTCGAACAACCTTTTTCTCAAGTTTTGTTTATGTTCTTAAATTTAGTTTAAAGTCCAACTACGGGTCCTCAAAAATCTCAGCAGCTTAGGTCAGGATCGCAA  
ACAAGTACATATCCAGGAGAAGTTTTGTTTTCAATTGCAATTGCTGTAGCTGGACTTCTTTTTGTTGCTCTTCTCATTGGGAATATGCA  
AACTTATCTTCACTCATTACGGTTCGCTTAGAGGAAATGAGATTAAAGACGCTGATTCGGAACAGTGGATGCATCACAGGTCACCTC  
CACAAAACCTGAGGGAACGAGTCAGACGTTATGATCAATAAAGTGTGGAACAAGAGGAGTCCGACGAGAAGAAACATAGTCCAGAGT  
TTACAAAAGATCTTAGAAGAGACATCAAAAGCCATCTCTGTCTAAATTTAGTTCGACGGGTTCTCTGTTTTGTTAATGATGAGAG  
ATTACTAGACGCAATATGTGAGAGACTAAAGCCAAGTCTATACACAGAGAGCACTTACATAGTGCAGAGAAGGAGACCCGGTTAACGAAA  
TGCTCTTCAATAACCGAGCCGGTTAGAGAGTGAACAAACAGATGGTGAAGAAAGCGGTTCTTAAACAGAGGTTTTATTGAAAGAAAGT  
GACTTTTGGTGAAGAGCTTCTGACTTGGGCACTTGACCCTAAAGCAGGCTCAAACCTTACCTTCTTCCACAGAACAGTGAAGGCTCT  
AAGTGAAGTACGCTTTCGCTTTAGAAAGCGAAGAGCTCAAGTTTGGTTCAGGCTAGCCAGTGGAGGCGCTTCCAGCTCAGTCTCAGTCTCAAC  
AACTTTTCAAGTTTTACTCTCAACAATGGAGGACTTGGGCTGCTTGTTCATCCAAGCCGCTTGGCGTAGACATTTAAGAAGGAAAATC  
GCAGAGCTTAGACGTAAGAAGAAAGAAAGAAAGAAATGGATTATGAAGATGATGAATATATGATGATAATATGGGTGGTATGGTTAC  
AAGGAGTGAATTTCTGTTGGATCAAGTTCTACATTACGTTCCACGGTATTTGCATCAAGATTTGCTGCTAACCGGCTTAAAGGTCATA  
AACTAAGGGTCAACGAGAGTTCAAGAGTTTTAATGAATTTAAACAAGCCATCAGAACCTGACTTTGAGGCTCTTGATACAGATGACTTG  
AACTGAGGCTTAGGCGCGCCGCAATTCAGTGTATTTCCCGCGGCGCGGGCCCGGCTGGAGCCACCCGAGTTCGAAAAATGAG  
AGCTCGAATTTCCCGATCGTTCAAACATTTGGCAATAAAGTTTCTTAAAGATGAATCCTGTGCGCGTCTTGCATGATTTATCATATA  
ATTTCTGTTGAATTACGTTAAGCATGTAATAATTAACATGTAATGCATGACGTTATTTATGAGATGGGTTTTATGATTAGAGTCCCGC  
AATTAATGATTTAATACCGGATAGAAAACAATAATACGCGCAAACTAGGATAAATATCGCGCGGCTGATCTGATGTTGATGATG  
CGGAATTCAGCTTTTGTTCCTTTAGTGAGGTTAATTCGAGCTTGGCGTAATCATGGTCAATAGCTGTTTCTGTGTGAAATTTGTTA  
TCCGCTCACAATTCACACAACATACGAGCCGGAAGCATAAAGTGTAAAGCCTGGGGTGCCTAATGAGTGAAGTAACTCACATTAATG  
CGTTGCGCTCACTGCCCCCTTCCAGTCGGGAAACCTGCTGTCGCGAGTGCATTAATGAATCGGCCAACCGCGGGGAGAGGCGGTTTTG  
CGTATTGGGCGCTTCTCCGCTTCTCGCTCACGACTCGCTGCTGCGCTCGGTCGCTTCCGCTGCGGCGAGCGGTTCCATAGGATCAAAAGC  
GGTAATACGGTTATCCACAGAATCAGGGGATAACGCAGGAAAGAACATGAAGGCCTTGACAGGATATATTGGCGGTTAACTAAGTCCG  
TGATGTGTTGTTGAGATCTCATGTGAGCAAAAGGCCAGCAAAAGGCCAGGAACCGTAAAGAGCCGCTGCTGCGGTTTTTCCAT  
AGGCTCCGCCCCCTGACGAGCATCACAAAAATCGACGCTCAAGTCAGAGGTGGCGAAACCCGACAGGACTATAAAGATACCAGGCGTT  
TCCCTTGGAAAGTCCCTGCTGCGCTCTCTGTTCCGACCTGCCGCTTACCGGATACCTGTCCGCTTCTCCCTTCCGGAAGCGTGG  
CGTTTTCTCATAGCTCACGCTGTAGGTATCTCAGTTCGGTGTAGGTCGTTCCGCTCCAAGCTGGGCTGTGTGCACGAACCCCGTTCCAG  
CCGACCGCTGCGCTTATCCGGTAACTATCGTCTTGTAGTCCAAACCGGTAAGACAGCACTTATCGCCACTGGCAGCAGCCACTGGTAA  
CAGGATTAGCAGAGGAGGATGTAGGCGGTCACAGAGTCTTGAAGTGGTGGCCTAACTACGGCTACACTAGAAGAACAGTATTTG  
GTATCTGCGCTTCTGCTGAAGCCAGTTACCTTCGGAAGAAGTGTGTTAGTCTTGTATCCGCGCAAAACAAACCCGCTGAGCGGTTG  
TTTTTTGTTTGAAGCAGCAGATTACGCGCAGAAAAAAGGATCTCAAGAAGATCCTTTGATCTTTTCTACGGGCTGTGACGCTCAGTG  
GAACGAAAACCTACGTTAAGGGATTTTGGTCAAGATTTATCAAAAAGGATCTTACCTAGATCCTTTTAAATTAATAAATGAAGTTTTA  
AATCAATCTAAAGTATAATGTGTAACATTTGGTCTAGTGATTGAAAAACTCATCGAGCATCAAATGAAACTGCAATTTATTCATATCA  
GGATTAATCAATCCATATTTTGA AAAAGCCGTTTCTGTAAATGAAGGAAACTACCGAGGCAATTCATAGATGCGCAAGATCTCTG  
GTATCGGCTGCGGATTCCGACTCGTCCAAACATCAATCAACCTATTAATTTCCCTCGTCAAAAATAAGGTTATCAAGTGAGAAATCAC  
CATGAGTACGACTGAATCCGGTGAGAATGGCAAAAGTTTATGCATTTCTTCCAGACTTGTCAACAGGCCAGCCATTACGCTCGTCA  
TCAAAATCACTCGCATCAACCAACCGTTATTCAATTCGATTTGCGCCTGAGCGAGACGAAATACCGGATCGCTGTTAAAAGGACAATT  
ACAACAGGAATCGAATGCAACCGCGCAGGAACACTGCCAGGCATCAACAATATTTTACCTGAATCAGGATATCTTCTAATACCT  
GGAATGCTGTTTTTCCCTGGGATCGCAGTGGTGAGTAACCATGCATCATCAGGAGTACGGATAAAAATGCTTGGTCCGAAGGCGATA  
AATTCGCTCAGCCAGTTTGTCTGACCATCTCATCTGTAACAACATTTGGCAACGCTACCTTTGCCATGTTTTCAGAAACAACTCTGGCGC  
ATCGGGCTTCCATACAATCGGTAGATTGTGCGACCTGATTGCCCCGACATTTTCGCGAGCCATTTATACCCATATAAATCAGCATCCA  
TGTGGAATTTAATCGCGGCTTGAGCAAGAGCTTTCCCGTTGAATTTGGCTCATAACACCCCTTGTATTACTGTTTATGTAAGCAGAC  
AGTTTTTATGTTGATGATATATTTTTATCTTGTGCAATGTAACATCAGAGATTTTGAACACACAGTACCTGCTTTGTTGAAATTAATCG  
AACTTTTGTGAGTTGAAGGATCAGATCACGCATCTTCCGACACGAGCCGTTCCGTGGCAAGCAAAAGTTCAAATCACAACCT  
GGTCCACCTACAACAAAGCTCTCATCAACCGTGGCTCCTTCTGCTGGATGATGGGCGATTACAGGCGATCCCATCAACAG  
CCGCGCTCGAGCGGGCT

Plasmid stock 1687, CNGC18promoter::intron-Flag-CNGC8 (cDNA), abbreviated as ps1687, 18p-i-Flag-CNGC8. The *CNGC18* promoter with an added intron in the 5' UTR, extends from an SbfI site to the first SalI site, followed by a sequence encoding Flag epitope tag (green italics). A linker connects the Flag tag to the coding sequence for *CNGC8*, which starts with the first ATG following an AscI site, in the

context of **GGCGCGCC**CGGCGGAATG, and ends with a TGA upstream of a NotI site, in the context of ACAGATGACTTGAAC**TGA**.

TTTTTATCCCCGAAGCCTGTGGATAGAGGGTAGTTATCCACGTGAAACCGCTAATGCCCGCAAAGCCTTGATTACAGGGGCTTCCG  
GCCCGCTCCAAAACCTATCCACGTGAAATCGCTAATCAGGGTACGTGAAATCGCTAATCGGAGTACGTGAAATCGCTAATAAGGTACAG  
TGAAATCGCTAATCAAAAAGGCACGTGAGAACCGCTAATAGCCCTTTCAGATCAACAGCTTGCAAACACCCCTCGCTCCGGCAAGTAGTT  
ACAGCAAGTAGTATGTTCAATTAGCTTTTCAATTATGAATATATATATCAATTATTGGTCGCCCTTGCTTGTGGACAATGCCGTACGC  
GCACCGGCTCCGCCCTGGACAACCGCAAGCGGTTGCCACCGCTCGAGCGCCAGCGCTTTGCCACAACCCGGCGGGCGGCGCAACA  
GATCGTTTTATAAATTTTTTTTTTTGAAAAAGAAAAAGCCGAAAGCGGCAACCTCTCGGGCTTCTGGATTCCCGATCCCCGAATTA  
GAGATCTGGCAGGATATATTGTGGTGTACGTTATCGATCTGGATTTTAGTACTGGATTTTGGTTTTAGGAATTAGAAATTTTATTGA  
TAGAAGTATTTTACAAATACAAATACATACTAAGGGTTTCTTATATGGCTCAACACATGAGCGAAACCTATAAGAACCCTAATTTCCCT  
TATCGGGAACTACTCACACATATTTTATGGAGAAAATAGAGAGAGATAGATTGTAGAGAGAGACTGGTGATTTACAGCTACCGAATT  
AATTTCTCCCGCAGCCAGCCGAGCGAGCTTAGCGAACTGTGGACGAGAAGTGTCCACCAAGCGTAAGGCCGTTCTCTCGCATTTGCCTT  
GCTAGGCTCGCGGAGTTGCTGGCTGAGGCGTTCTCGAAATCAGCTCTGTTTGGTCCGATCTACTCTATTCCTTTGCCCTCGGACGA  
GTGCTGGGCGCGGAGACTCAATAGGTCAGCTTCTCGACAGCACTCCCAATGTCAAGCACTCCGGAATCGGGGAGCTCCGGCCGAT  
CCCGACAGTCCCGGCTCCGGATCGGACGATTGCTCGCATCGACCTCGCCCAAGCTGCATCATCGAAATTTGCCGTCAACCAAGCTCT  
GATAGAGTTGGTCAAGCAATCGGGAGCATATACGCCCGGAGGCGTGGCGATCCTGCAAGCTCCGGATGCCTCCGCTCGAAGTAGGCC  
GTCTGTCTCCATAACAAGCCAACCACGGCTCCAGAAGAAGATGTTGGCCACTCGTATTGGGAATCCCCGAACCTCGCTCGCTCCA  
GTCAATACCGCTGTTTTGCGGCCATTGTCCGTCAGGACATTGTCAGGCGAAATCGCGTGCACAGGTCGGGATTTCCGGACTTCGGCCGAT  
CCTCGGCCCAAAGCATCAGCTCATCGAGACCTGCGGACGGACGACTGACGGTGTCTCCATCACAGTTTGGCAGTGATACACATGG  
GGATCAGCAATCGCGCATATGAATCAGCCATGTAGTGTATTGACCGATTCTTGGCGTCCGAATGGGCGGAACCCGCTCGTCTGGCT  
AAGATCGGGCGCAGCGATCGCATCCATAGCCTCCGCGACCGGCTGAAGAACAGCGGGGAGTTCCGTTTACGGCAGGTTCTGCAACGTGA  
CACCTTGGGACCGGCGGAGACTCAATAGGTCAGCTTCTCGTGAACCTCCCAATGTCAAGCACTCCGGAATCGGGGAGCTCCGGCCGAT  
GCAAAGTGCCGATAAACATAACGATCTTTGTAGAAACCATCGGCGCAGCTATTTACCCGACGACATATCCACGCCCTCTACATCGAA  
GCTGAAAGCAGGAGATTCTCGCCCTCCGAGAGCTGCATCAGTCCGAGACGCTGTCAAGCTTTTCGATCAGAACTCTCGACAGACG  
TCGCGGTGAGTTCAGGCTTTTTCATAGGGATCAGCTTGGGCTGTCTCTCAAATGAATGAATCTCTTATATAGAGGAAGGGTCTTG  
CGAAGGATAGTGGGATTTGCGCTCATCCCTTACGTCAGTGGAGATTGTCAGTCAATCAATCCACTTGTCTTTGAAGCTGTTGGAACGCTCT  
CTTTTCCACGATGCTCCTCGTGGGTGGGGTCCATCTTTGGGACCACTGTCCGCGAGAGGCATCTTGAATGATAGCCTTTCCCTTATCG  
CAATGATGGCATTTGTAGGAGCCACTTCTTTCTACTGTCTTTTCGATGAAGTGACAGATAGCTGGGCAATGGAATCCGAGGAGGTT  
TCCCGAAATACCTTTGTTGAAAAGTCTCAATAGCCCTTGGTCTTCTGAGACTGTATCTTTGACATTTTGGAGTAGGGGTACGATA  
ACATTAACGTTTTACAATTCGCGCCATTCGCCATTCAGGCTCGGCAACTGTTGGGAAGGGCGATCGGTGCGGGCCCTCTTCGCTATTACG  
CCAGCTGGCGAAAGGGGGATGTCTGCAAGGCGATTAAGTTGGGTAACGCCAGGTTTTCCAGTCACGACGTTGTAACACGACGGCCA  
GTGAATGTAATACGACACATATAGGCGCAATGGGTACCGTTTAAACAAGCTTCCTAGCCCTGCAGGGGATCCTGGGTTTTGTATCT  
AAGATCAAAGGAATAACATTTTTGGGAGATGAGAACTTCAAAGATGCGATTTAGTTTTTGTGGAAAAGTGGGGAATTTAATTCGAT  
TGACGTTAGAACTTTTTCTCTATGGATCTTTTGGGTTTTGTGATTAATGGCATGAAGGTACAAGGAAAAGTTTTGGCCAAACAAAATC  
AAGAACCACAAAGAGAGAGAGAGAGAGAAACACACAGACAAAACATATGAAGAATGATTAAGATAACTGCCACAAATATAACTGCAA  
AATAACATACTCTTAAGAAAATAGTGGGCGCTCTTTGTTATGGAAGAATGTCAAACTTTTTATATGGTTAAGTATATAGTATT  
ATTATATCAAAATTCATTTTTGACTATATATAGGTGATTGTGTGCAAACTCACGTAAGATCTTTGTAACATTTTTTCCACACTAGTTAAT  
TTTTACATGTATTAAGATTCGCTGCAAAAAAAGAAAAAAGAAAAAAGAAAAAAGAAAAAAGAAAAAAGAAAAAAGAAAAAAGAAAAA  
GATTGATCAAAACCGATTTTAAAAGCTTAAACTAATAAATCGATTTCAATCCCAATTTATTAATAATAGATCGTTTTGGAGGTTCAAG  
AATATCTGGTCTGTTTTAAGACGATATTTGAACTTTGAACCGTTGAAACTATATATACTAGGTATATTTACTGTATGTTGTAAGG  
GTTTACTATCACATGGCTATTATATAAGACCGTACTAACATATGCAATATTTATATGTTGGATCAAAGTACCACAAATTTTGGAGTGAACC  
AAAAACAAAAGGTTAGAGATAGAAAAATATGCATGTAAAAAATAAAGAGATGAAAGAAATATTAATGGGAGATGGGTGGGAAATGAA  
TAGATTGGTGTCTTCGTCACTTTTACTTTTTTTTTTTTTTTTATGTTTGTGTTGATAGTACCAAGAGATTTCTTATTCTATTCTTTCTGTA  
TGGTTTTATTTAGGGTATATTACGTGACCTGTAGTTCATCCTCTCCAACCTCAAACCCACAAATTATTCACATACATATATCCAAAG  
ATTATTTATCAAAGATATGACTAAAAATCTCTATACAGTGTGTATGTAATAGAAAGGTGCAAGGATTTTGGTGTGGCACCACCTTCA  
AGACTTTTTTTTTTATCAAGACCTAECTTACCACCTTGAAGCGAGCTTATCTTATTTCTTTTATAGAAAACAAAGTTTGGCCAAACGAGTGT  
TTAAACTTCACAAAACATACTACTTTTTTATTCGATAAAAACAAAAGATTTTATTAGTCTTTTTTCAATAGGGTCCCAATGATTAATA  
TGTTACGATCAGGAAATTTCTTCTTGGTCCCGTAAGCATTATATTAATCAAAACAAAAGGAAATTTGTTGCTTCTTACATATGGGAA  
GTGGAAACCTTTGCCATCTTCAATAATGTTTTAAATCTTTTTTTTTTTCTTTCTAATGTGTGTTTCATAAACACCAGCGACTTTATTGAA  
AAGAGAACACGTAATTTGATTTCTCAAAGAACAAATTTTTTAGGAAGAGTAACTTTGTTTTCTTATCTTAATATAAGCAACGAAAT  
CAATCGTGCATATAAAGTGAATGCTATTTTGAATTTCTAAACTTGACTAGCAAAATTTTCACTAAAAAATAAATAAAGTAAACG  
ATAAAGTAGTTGTCGTATAGTCTACTCCACATGAATAAATAAATAAAGTAAATCAATAGAATGTAATCTCTTAATTAATCATACTTAT  
TATATAATCACAGTGGCAAGTGAATAAAAAAAGAGGAGAATTCGATCCCGTCCGATTCTATATTTAAAGATCCGTAACATCTCT  
AAATCTGCCACAGTGGTCATACTTAATAGCAGCCATTAACGAAGTAAATAATAGTTCGATAATAATGTTTAAACACATCGTATTCTT  
AGATCCATGAATTAGTTGGAGTAAATTAACATCATTTGTTTCTTAATTAAGTTTAAACAAGCATAGAGAAAACAATATTGTCACATATGTTA  
GTATAAGTTATCATAATCATTTATAAAGCTTGTATTAATTTTTTATATTGAAATTAATCTTGTCTAATCGGAAAATGATGGAG  
TACTAAAATTTGAAGGACTAAAATACGTCATTTATTGTAGAGAAAACAATTAACGATAAGTGTGATTTTTTGGAAAGTGGAAAAGTTAGT  
ATGTCCTCTATATGATATGATGGAAGTTGTTGTTCTTTTTGTGTTGATAAACAATTTTTTCCGTGACGTAATTTTTAATTTTCAAT  
CTATTTTTATTTCTCACTTTATTTATCCCTTTTATATTCGATATTTGTTTCAAGGATTTTCTTAAAGGATTTCTATTTCTTATTATAGG  
TACACTATCTTATGGATGGTGTCAACAAGCATGTACACTATCTTCCACTACCACATATTGTCACAGAAATGTTGGTACGCGTGTCTCT  
ATATACTTTAATAGTACATAACAACAACAATGAATTTATGTAAGCAAAATTTGTTAAACTGATGTCAAAAACGGAAATACTACAAAAGA  
CAGTATAATGAATACGGGTTAATGTTGTTGACAAAATAAATAAATGAGCTCATAAACTTCAATAATTCACTTAAATAAATCTTA  
ATGAACCTCATAACGAATAGATATTTTAACTAATCTTATGTTGTTTACGAATTAATATAAATTTTTTTTTTTTTTTTGTGTAACAAT  
TGAACATAACAATATAAACCAGACTTTAAGTTAAACTACTAAAACATTTATAGTTTATCAATAGAAATGATCATAGCAATTTGATATA  
CATTTATAATGTGAATTTTAAATCCTAAAGCATATATAGTATATATCCCTTGATTTTCATAGAAAAAAGTAGAAAAAATAAATCTAT  
TGGGCGGATCTATAACTATTGGGCGGTTGGTCCAAACAATAAGACAGTAGATATTGTGTCGATTTGAAGTTTTGAGATGCAAAACGTTG  
TGCTGTTTTGAGAACACAAAACAGCATAAAACAACGAGACCCGCAACTATAACATTTCCGTAATAACCTCATTCTCCCATATATTTT  
CAAAAACACCTTCCCTTATTTCCATGGCCCTTCTCTCAGTTTTCCCGGAGAAATCCTCTCTTCTTCCATAATCATCAAAAACAA  
AATGCAAAAACCAAAAAACAAAAATCACACGACGCAACCACTAGCCTCTCTGTCCATCAATCTCTCTGTGTTAATGC

GGAATCCGATTTAACACCGGAATCCGCCATGGAAGGGAGGCGGTGTGCGAGGTGCAGTAGTCCACCTTCACTTGCTCTCTTTTTCCGAA  
GAATCTGGTTCGTTCTCTTTGAATTATCTCTTTCTCTGTTCTTCTCTTTTTCTAAAGTCTCGAATATATCTTCAATATCACTACTTT  
ATTTGCTTCGTTCTTCGCGAGTTTGTGCAAGTTTTAAACGATTTTTGGTTTTTGAACGAGGACAGAGAGAAGGCGGCTGAC **ATGG**  
**ACTACAAAGACGATGACGACAA**GTCGAC **GGCGGCC**CGGCGGA**ATG**TCATCTAATGCTACGGGAATGAAGAAGCGATCATGTTTTGGA  
TTGTTTAAAGTAACTAGTTCGTTGGAGGAGGAAAGACAAAGAACACATCAAATCATTTCGAGAAGGTGTTAAATCGGATCAGAGGGTCT  
AAAAACGATCGGAAAATCATTCACATCAGGTGTAACAAGAGCTGTTTTCCCTGAAGATCTAAGAGTCTCCGAGAAGAAAATCTTTGATC  
CTCAAGACAAAACACTTTTATTATGGAACAGAATGTTTGTATTCTCTGCATTCCTGCTGCTCTGTTGATCTCTGTTCTCTATCTC  
CCTATTGTCGATAACTCAAAGAACTGCATTTGGATTGACTCTAAATTAGCTGTGACAACACTACTCTAAGAACGATCATCGATGTTTT  
TTATCTTACACGAATGGCTCTTCAGTTCGGTACCGCTTACATTGCTCTCTCTCTGCTGTTGGAAGAGGTGAGCTTGTGATCGACC  
CTGCAAAGATCGCTGAACGGTATTTGACTCGTTATTTTATTGTCGATTTCTCTCGCGTTCTTCTTTACCTCAGATTGCTGTGTGGAAG  
TTCTTTCACGGATCTAAAGGAACAGATGATTACCAACAAAACAGCCGCTATTACACATTGTCATCACACAGTACATCAAGATTCTGT  
TAGGTTTTATCCATTAAGCTCAGAGCTCAAAGAAAACAGCAGGAGCTTCTGCTGAAGGTGCTTGGGCTGGTGTCTTATTCCTCT  
GGTATATGCTTGAAGTACATAACTGGAGCGTCTGTTGACATGTTGTCAGTGAACGTAACGATACATGCTTGAGATCCGCTTGTA  
GTCCAGCTGATCCCAAGGTCTGTGTTTCAAGTTTTGTTTATGTTGGCAGCAAAATTAATGAGCAGTCGCGAAAACCGACTGGATCAAATCAGT  
CCCTGATCTTTTTAAGAACAATTTCTGCTAAAAGCGATGAGTCTAAATCAACTACGGATCTATAGCCAGGCTGTGCTTCCGGTA  
TTGATTTAGCACAACGTTTTCTCAAGTTTTGTTTATGTTCTGATGTTGTTGGGCTCCAAAATCTCAGCACGTTAGGTCAGGGCTGCAA  
ACAAGTACATATCCAGGAGAAGTTTTGTTTTCAATTGCAATTGCTGTAGCTGGACTTCTTTTGTGTTGCTTCTCATTGGGAATATGCA  
AACTTATCTTACGTCACCTACGGTTCGGTTCAGGAAATGAGGATTAAGAAGCGTGATTCGAAACAGTGGATGCATCACAGGTCACCTC  
CACAAAACCTGAGGGAACGAGTCAGACGTTATGATCAATCAAAATGGTTGGAACAAGAGGAGTCGACGAGAAGAAAACATAGTCCAGAT  
TTACAAAAGCTTACAGGATGAGACATCAAAGCCATCTCTGATTAATGTTGGTGGGCTCCAAAATCTCAGCACGTTAGGTCAGGGCTGCAA  
ATTACTAGACGCAATATGTGAGAGACTAAAGCCAAGTCTATACACAGAGACACTTACATAGTGCAGAGAAGGAGACCCGGTTAACGAAA  
TGCTCTTATAATCCGAGGCGGTTAGAGAGTGAACACAGATGGTGGAAAGAGCGGTTCTTTAAACAGAGGTTTATTGAAAGAAGGT  
GACTTTTGTGGTGAAGAGCTTCTGACTTGGGCATTAGACCCTAAAGCAGGCTCAAATCTACCTTCTTCCACAGAACAGTGAAGGCTCT  
AAGTGAAGCTTTCGCTTTAGAGAGTGAAGAGCTCAAGTTTGGCTAGCTAGTTCAGGCTGTTTCAAGCTGATGATGATGATGATGATGAT  
AACTTTTCAAGTTTTACTCTCAACAATGGAGGACTTGGGCTGCTTGTTCATCCAAGCCGCTTGGCGTAGACATTTAAGAAGAAAATC  
GCAGAGCTTAGACGTAAGAAGAGAAGAAGAAATGGATTATGAAGATGATGAATATTATGATGATAATATGGGTGGTATGGTTAC  
AAGGAGTGAATGTTGTTGATCAAGTTCTACATTACGTTCCACGGTATTTGCATCAAGATTTGCTGCTAACCGCTTAAAGGTCATA  
AACTAAGGCTCCAGAGTTCAAAGGTTTTAATGAATTTAAGCAAAAGCTGATCAAGAACTGACTTTGAGGCTCTGATCAGATGACTTG  
AACTGAGGCTTAGGCGCGCGGCAATTCAGTGTGATTTCCCGCGCGCGGGGCCGCTGGAGCCACCCGAGTTCGAAAATGAG  
AGCTCGAATTTCCCGATCGTTCAAACATTTGGCAATAAAGTTTCTTAAAGATGAATCCTGTTGCCGCTTTCGCGATGATATCATATA  
ATTTCTGTTGAATTACGTTAAGCATGTAATAAATTAACATGTAATGCATGACGTTATTTATGAGATGGGTTTTTATGATTAGAGTCCCGC  
AATTATACATTTAATACGGATAGAAAACAAAATATAGCGCGCAAACTAGGATAAAATATCGCGCGGTTGATCAGTCTATGTTACTAGAT  
CGGGAATTCAGCTTTTGTTCCTTTAGTGAGGTTAATTCGAGCTTGGCGTAATCATGGTCATAGCTGTTTCTGTGTGAAATTTGTTA  
TCCGCTCACAATTCACACAACATACGAGCCGGAAGCATAAAGTGTAAAGCTGGGGTGCCTAATGAGTGAAGTAACTCACATTAATG  
CGTTGCGCTCACTGCCCCGTTCCAGTCGGGAAACCTGTCGTGCCAGCTGCATTAATGAATCGGCCAACCGCGGGGAGAGGCGGTTTG  
CGTAAAGGCTCCCTGCGCTTCTCGCTCACGACTCGCTCAGTGCCTGCTTACCGGATACCTGTCGCGCTTTCGCGCTGCGCGGAGGCTT  
GGTAATACGGTTATCCACAGAATCAGGGGATAACGCAGGAAAGAACATGAAGGCCTTGACAGGATATATTGGCGGGTAAACTAAGTCGC  
GTATGTGTTGTTGAGATCTCATGTGAGCAAAAGGCCAGCAAAAGGCCAGGAACCGTAAAGGCCGCGTGTGCTGGCGTTTTCAT  
AGGCTCCGCCCCCTGACGAGCATCACAAAATCGACGCTCAAGTCAGAGTGGCGAAACCCGACAGGACTATAAGATACCAGGCGTT  
TCCCTTGGAACTCCCTGCTGCGCTCTCCTGTTCCGACCTGCCGCTTACCGGATACCTGTCGCGCTTTCCTTCCCTTCGGGAAGCGTG  
CGCTTCTCATAGCTCACGCTGTAGGTATCTCAGTTCGGTGTAGGCTGTTCCGCTCCAAGCTGGGCTGTGTGCACGAACCCCGTTCAG  
CCGAGCCGCTGCGCTTATCCGGTAACATCGCTTGGAGTCCAACCCGGTAAGACAGACTTATCGCCACTGGCAGCAGCCACTGGTAA  
CAGGATTAGCAGAGCGAGGTATGTAGGCGGTGTACAGAGTCTTGAAGTGGTGGCCTAACTACGGCTACACTAGAAGAACAGTATTTG  
GTATCTGCGCTCTGCTGAAGCCAGTTACCTTCGGAAGAAGGTTGGTAGCTCTTGATCCGCGCAACAAACCCGCTGGTAGCGGTTG  
TTTTTTGTTTGAAGCAGCAGATTACGCGCAGAAAAAAGGATCTCAAGAAGATCCTTTGATCTTTTCTACGGGCTGTGACGCTCAGTG  
GAACGAAAACCTACGTTAAGGGATTTTGGTCAAGATATCAAAAAGGATCTTACCTAGATCCTTTAAATTAATAAATGAAGTTTTA  
AATCAATCTAAAGTATATATGTGAACATTTGGTCTAGTGTATTAGAAAACCTCATCGAGCATCAAATGAAACTGCAATTTATTCATATCA  
GGATTAATCAATCATAATTTTTGAAAAGCCGTTTCTGTAATGAAGGAGAAAACCTACCGAGGCGATTCATAGGATGGCAAGATCCTG  
GTATCGGCTGCGATTCCGACTCGTCCAACATCAATACAACCTATTAATTTCCCTCGTCAAAAATAAGGTTATCAAGTGAAGAAATCAC  
CATGAGTGAAGTGAATCCGGTGAGAATGGCAAAAGTTTATGCATTTCTTCCAGACTTGTTCACAGGCCAGCCATTACGCTCGTCA  
TCAAAATCACTCGCATCAACCAACCGTTATTCATTCGTTGTCGCTGAGCGAGACGAAATACCGGATCGCTGTTAAAAGGACAATT  
ACAACAGGAATCGAATCCGCGCAGGAAACACTGCCAGCCATCAACAATATTTACCTGAAATCAGGATATCTTCTAATCACT  
GGAATGCTGTTTTCCCTGGATCGCAGTGGTGAATACCATGCATCATCAGGAGTACGGATAAAATGCTTGAATGGTGGGAGAGGCATA  
AATTCGCTCAGCAGTTTGTGACCATCTCATCTGTAACAACATTTGGCAAGCTACCTTTGCCATGTTTCAGAAACAACTCTGGCGC  
ATCGGGCTTCCATACAATCGGTAGATTGTGCGACCTGATTGCCGACATTATCGCGAGCCATTTATCCCATATAAATCAGCATCCA  
TGTGGAAATTTAATCGCGCCTTGAGCAAGACGTTTCCCGTTGAATATGGCTCATAACACCCCTTGTATTATGTTTGAAGCAGAC  
AGTTTTATTTGTTATGATATATTTTTTATCTTGTGCAATGTAACATCAGAGATTTTGAGACACAACGTTGCTTGTGTAATAAATCG  
AACTTTTGTGAGTTGAAGGATCAGATCACGCATCTTCCGACAACGCAGACCGTTCCGTGGCAAGCAAAGTTCAAATCACAACCT  
GGTCCACCTACAACAAGCTCTCATCAACCGTGGCTCCCTCACTTTCTGGCTGGATGATGGGCGATTACGGCGATCCCATCAACAG  
CCGCGCTGAGCGGGCT

Plasmid stock 1692, CNGC18promoter::intron-Flag-CNGC7 (genomic DNA), abbreviated as ps1692, 18p-i-Flag-CNGC7. The CNGC18 promoter with an added intron in the 5' UTR, extends from an SbfI site to the first SalI site, followed by a sequence encoding Flag epitope tag (green italics). A linker connects the Flag tag to the coding sequence for CNGC7, which starts with the first ATG following an AscI site, in the context of **GGCGGCC**CGGCGGA**ATG**, and ends with a TGA upstream of a NotI site, in the context of GATTTTGTGCTGA**TGA**.



TTTTTATCCCGGAAGCCTGTGGATAGAGGGTAgTTATCCACGTGAAACCGCTAATGCCCGCAAAGCCTTGATTACAGGGGGCTTCCG  
GCCCGCTCCAAAACTATCCACGTGAAATCGTAATCAGGGTACGTGAAATCGTAATCGGAGTACGTGAAATCGTAATAGGTCACG  
GAAATCGCTAACTAAAAGGCGACGTGAGAACGCTAATAGCCCTTTCAGATCAACAGCTTGCAAACACCCTCGCTCCGGCAAGTAT  
ACAGCAAGTAGTATGTTCAATTAGCTTTTCAATTATGAATATATATATCAATTATTGGTCGCCCTTGCTTGTGGACAATGCCGTACGC  
GCACCGGCTCCGCCGTTGGACAACCGCAAGCGGTTGCCACCCTGCGAGGCCAGCGCTTTGCCACAACCCGGCGGGCGCAACA  
GATCGTTTTATAAATTTTTTTTTTTGAAAAAGAAAAAGCCGAAAGGCGGCAACCTCTCGGGCTTCTGGATTTCGGATCCCCGGAATTA  
GAGATCTTGGCAGGATATATTGTGGTGAACGTTATCGATCTGGGATTTAGTACTGGATTTTGGTTTTAGGAATAGAAATTTTATTGA  
TAGAAGTATTTTACAAATACAAATACACTAAGGTTTCTTATATGCTCAACACATGAGCGAAACCTATAAGAACCCTAATTTCCCT  
TATCGGGAACTACTCACACATTTATTTGAGAAAAAGAGAGAGATAGATTTGTAGAGAGAGACTGGTATTTCAGCGTACCGAATT  
AATCTCCCGCAGCCAGCCGAGCGAGCTTAGCGAAGCTGGACGAGAACTGTGCCACCAAGCGTAAGGCCGTTCTCTCGCATTTGCCT  
GCTAGGCTCGCGGAGTTGTGGCTGAGGCTTCTCGAATCAGCTCTTGTTCGGTCGGCATCTACTCTATTTCCCTTTGCCCTCGGACGA  
GTCTTGGGCGCTTCCACTATCGGCGAGTACTTCTACACAGCCATCGGTCCAGACGCGCGCTCTCGGGGAGCTTTTGTACG  
CCGACAGTCCCGGCTCCGGATCGGACGATTGCGTGCATCGACCCTCGGCCAAGCTGCATCATCGAAATTTGCCGTCAACCAAGCTCT  
GATAGATTGGTCAAGCAATCGCGAGCATATACGCCCGGAGGCGTGGCGATCCTGCAAGCTCCGGATGCCTCCGCTCGAAGTAGCCG  
GTCTGTCTCCATACAAGCAACACGGCCTCCAGAAAGATGTTGGCGACCTCGTATTGGGAATCCCCGAACATCGCTCGTCCA  
GTCAAATGACCGCTGTTATGCGGCCATTTCCGTCAGGACATTTGTTGGAGCCGAAATCCGCGTGCAGAGGTCAGGCTCGGGCAGT  
CCTCGGCCCAAAGCATCAGCTCATCGAGAGCTGCGCGACGGACGACTGACGGTGTCTCCATCACAGTTTGGCAGTGATACACATGG  
GGATCAGCAATCCGCGATATGAAATCAGCCATGTAGTGTATTGACCATTCTTGGCGTCCGAAATGGGCGCAACCCGCTCGTCTGGCT  
AAGATCGGCGCAGCGATCGCATCCATAGCCTCCGCGACCGCTGAAGAACAGCGGGCAGTTCGGTTTCAGGCAGGTTTGCACCGTGA  
CACCTGTGACCGCGGAGATGCAATAGTCCAGGCTCGCTCGTAACTCCCCAATGTCAAGCACTCCGGAATCCGGGACCGCGCGAT  
GCAAAGTGCCGATAAACATAACGATCTTTGTAGAAACCATCGGCGCAGCTATTTACCCGACGACATATCCACGCCCTCTACATCGAA  
GCTGAAAGCAGGAGATTCTCGCCCTCCGAGAGCTGCATCAGGTCCGAGACGCTGTGCAACTTTTCGATCAGAACTTCTCGACAGACG  
TCGCGGTGAGTTGAGGCTTTTTCATAGGGATCAGCTTGGGCTGTCTCTCCAATGAAATGAACTTCTTATATAGAGGAAGGTTG  
CGAAGGATAGTGGCGTCCGTCATCCCTTACGTCAGTGAGATGTCACATCAATCCACTTGTCTTGAAGATAGTGGACCTGGAAGCTCT  
CTTTTCCACGATGCTCCTCGTGGGTGGGGTCCATCTTTGGGACCACTGTCGGCAGAGGCATCTTGAATGATAGCCTTTCCCTTATCG  
CAATGATGGCATTTGTAGGAGCCACTTCTTTTCTACTGTCTTTTCGATGAAGTGACAGATAGCTGGGCAATGGAATCCGAGGAGGTT  
TCCCGAAATTACCCTTTGTTGAAAAGTCTCAATAGCCCTTGGTCTTCTGAGACTGTATCTTTGACATTTTGGAGTAGGGGTACGATA  
ACATTAACGTTTACAATTTCCGCCATTTAGCTTACGCTTCCGTTCTTGGGAAGGGCGCATCGGTGCGGGCCCTCTCGTATTACG  
CCAGCTGGCGAAAGGGGATGTGCTGCAAGGCCGATTAAGTTGGGTAACGCCAGGTTTCCAGTCAAGACGTTGTAAAACGACGGCCA  
GTGAATGTAATACGACTCACTATAGGGCGAATGGGTACCGTTTAAACAAGCTTCCTAGCCCTGCAGGGGATCCTGGGTTTTGTATCT  
AAGATCAAAGGAATAACATTTTTGGGAGATGAGAACTTCAAAGATGCGATTTAGTTTTTGTGGAAAAGTGGGGAATTAATTCGAT  
AGACTTTTTTTTTTACAAGACCTAATCTTACCACTTTGAAAGCAGCTTATCTTATTTCTTTAGATAAAACAATGATAAGCGAGTGTCT  
TTTAACTTACAAAACCTACAATCTACTTTTTATTCGATAAAAACAAAGATTTTATTAGTCTTTTTTATTAGGGTCCCAAATGATTAATA  
TGTTACGATCAGGAAATTTCTTCTGCGTCCGTAAGCATTATATTAATCAAAACAAAAGGAAATTTGTTGCTTCTACAAATGGGAA  
GTGGGAACTTTGCCATCTCAAAATGTTTTAAATCTTTTTTTTTTTTTTTTTTTTCTTCTAATGTGTGTTTCATAAACACCAGCGACTTTATGAA  
AAGAGAACACGTTAAGATTTGTATTTCTCAAAGAACAAATTTTTTTAGGAGAGTAACTATTTGTTTTCTTAAATTAAGCAACGAAAT  
CAATCGTGCATATAAAGTGAATGCTATTTTGAATTTTCTAAACTTGACTAGCAAAATTTTACTAAAAAATAAATAAAGTAAACG  
ATAAAGTAGTTGTCGTATAGTCTACTCCATGAATAAATAAATAAAGTAAATCAATAAGATGTAATCTCTTAATTAATCATACTTAT  
TATATAATCACAGTGGCAAAGTGAATAAAAAAGAGGAGAAATGGATCCCGTCGGATTCTATATTTAAAGATCGCTAACATCTCT  
AAATCTGCCACAGTGGTACATACTTAATAGCAGCATAACGAAATGTAAGCAAAATGTTTAACTGATGTCAAAACCGGAAATACTACAAAAGA  
AGATCCATGAATTAGTTGGAGTAAATTAACATCTGTTTCTTAATTACGTTTAAACAAGCATAAGAAAACAATATTGTCCACATATGTTA  
GTATAAGTTATCATATAATCATTTATAAAGCTTGTATTATTTTTATATTGAAATTACTACTTTGTCTAATCGGAAATGATGGAG  
TACTAAAATTTGAAGGACTAAAATACGTCATTATGTTAGAGAAAACAATACGCATAAGTGTGATTTTTTGGAAAGTGGAAAAGTTAGT  
ATGTCCTCTATATGATGATGATGGAAGTTGTTGTTTTTTGTTGGATAAACATCATTTTTCCGTGACGTAATTTTTAATTTTCAGTAT  
TCATTTTTATTTACTACTTCTTATTTATTTCCCTTTTATATTCGATAAATGTTTTCTAAGGATTTCTATTTCCCTTTTGTATTATAGG  
TACACTATCTTATGGATGGTGTCAACAAGCATGTACACTATCTTCCACTACCACATATGTCACAGAAATGTTGGTACGCGTGCTTCT  
ATATACTTTTAAATAGTACATAACAACAACAAATGAAATGTAAGCAAAATTTGTTAACTGATGTCAAAACCGGAAATACTACAAAAGA  
CAGTATAATGAAATACGGGTTTTAATGTTGACAAAATAAATAAATGATGCTCATAAAACCTCAATAATTAATTAATTAATTAATTAAT  
ATGAACCTCATAACGAATAGATATTTTAACTAATCTATCATGTTTACGAAATTAATTAATTAATTAATTAATTAATTTTTTTTTTATCTT  
TGAACATAACAATATAAACCAGGACTTTAAGTTAAACTACTAAAACATTATAGTTTATCAATAGAAATGATCATAGCAATGTGATA  
CATTATAATGTGTAATTTTAAATCCTAAAGCATATATAGTATATATCCCTTTGATTTTCATAGAAAAAAGTAGAAAAAATAACTAT  
TGGGCGGATCTATAACTATTGGGCGGTTGGCCCAACAACATAAGAACAGTAGATATTGTTGTCGATGGAAGTTTTGAGATGCAAAACGTG  
TGCTTTTTTAGAACAACAAAACAGCATAAACAAAACGAGACCCGCAACTATAACATCTCCGTAATAACCTCCGTTCCCTTCAATCTCT  
CAAAAACACCCTTCCCTTATTTCCATGGCCCTTCTCTCAGTTTTCCCGGAGAAATCCTCTCTCTTCCATAATCATCAAAAACAA  
AATGCAAAACCCAAAAAACAATAAACAACAGCAGCAACCCAGCTAGCCCTCTGTCATCAATCTCAATCTCTCTGTGTTAATGC  
GGAATCCGATTTAACACCGGAATCCGCCATGGAAGGGAGGCGGTTGCGAGGTCAGTAGTCCCACTTCACTTGCCTCTTTTTCCGAA  
GAATCTGGTTCGTTTTCTCTTGAATTTCTCTTTCTCTCTTCTCTCTCTTTTTTCTAAAGTCTCGAATAATATCTTTCATTAAGTACTTT  
ATTTGCTTCTGTTCTCCGAGTTTTGTGCAAAGTTTTAACGATTTTTGGTTTTGAAACGAGGCACAGAGAGAGGGCGCTGCACATGG  
ACTACAAAGACGATGACGACAACGTCGACGGCGCCGCGGGAATGATGATGCAGAAACTGTTTCGGATTAACCTAAAGAACCGA

GGAGGTGAAAAGAAAGCATCCAAATCTTTAGGGGAGGAGTTAAAAAATCAGATCAGAAGGTCTAATAACCATCGGTAATCCGT  
TACAAGAGCGGTTTTCCAGAAGACTTAAGAATAACAGAGAAGAAAACTTTTGATCCTCAAGACAAAACACTTCTCGTATGGAAACAGAT  
TGTTTCGATTTTCGCTGATTTTTAGCTGCTCTGTGATCCCTTCTATCTTCCATTGTCGATAAATCCGGAAGCAGCTGTATA  
GGGATTGATACGAACTAGCTGTTACAACGACACTCTTAGAACATTGTTGACGTTTTTTACTTAACTAGAATGGCTCTCAGTTTTCG  
TACAGCTTATATAGCTCCTTCTCTCGTGTGTTGGTGGTGGGAGCTTGTGATTGATCCTGCAAAGATCGCTGAACGCTATTTAACCC  
GTATTTTCGTCGTCGATTTCTTGCAGTGCTGCCTTTACCGCAGGTAACACAGAGTGAAGATCCTTTGATGGTTACTAAAAATATG  
GACTTTTTGGGATTGATTATGATTTTTGTGTGGATATTACAGATTGCAGTGTGGAAGTTTCTTACGGGTCTAAGGATCGGATGTGTT  
ACCAACGAAAACGGCATGTTGAACATGTAATTTGTGAGTATATTCCGAGATTTCGTGAGGTTTATTCCGTTAACATCAGAGTTGAAGA  
AACTGCAGGAGCTTTTCCGAAGGAGCTTGGCTGGTGTCTTATTATCTTCTCTGGTATATGCTTGAAGCCAGTAAGCGTTTTCT  
ATGTATATATGACTCTTCTTAATTAGTGTTTTGTGACATTTTATTCATCATTGGTCACTTTCTGACTTTACAACACATTTTGACAGATA  
ACTGGAGCGTTTTGGTACATGTTGTGCTAGTGGAGCGTAACGATACTTGTGGAGATTTCGCTGTAAGTTTCAGCCAGATCCCGACTCTG  
TGTTAGATTCTGTTTCTGGACTAAATTTGTGAGCAGTGGAGAACTGAAATGGATCAAACAGTCCCTTAAAGCAATTT  
GTTCTGCTAAAGCAGATGATTCAAAGTTAACATATGGGATATACGGTACGGCTATATCTTACGGCATTGTATCATCAACAACATTTTTCT  
TCCAAGTTCTGTTATTGCTATGGTGGGCTTCAAAATCTCAGGTAAGGCGGGGGCAACTCATTTGTCATTGGTTCAACCGATAGCTTG  
TGCAGAGTACTCTTGACATCTTTGGTGTTTTCATGAACAGCAGCTTAGGTCAGGGCTGCAGACAAGTACATTTCCAGGAGAGGTTTTG  
TTTTCTTTCAGGCTTATAGCTGGGCTTCTTCTTTTCGCGCTTCTCATCGGGAATATGCAGACTTATCTTACACTTACTTGTTCG  
TCTCGAGGAAATGAGGATCAAAAGACGTGACTCAGAACAGTGGATGCATCACAGGTCACTTCCACAAAATTTGAGGGAAAGAGTCAGAC  
GCTATGATCAATACAAATGGTTAGAGACAAGAGGTGTAGACGAAAGAAAATAGTTACAGAGTTTACCTAAGGATCTCAGAAGAGACATC  
AAACGCCATCTCTGTCTGAATTTAGTTAGGAGGGTAAGTTTTCAATCAGAATGCTAAAATGCTTGAATACTAACTAATATGTGT  
TCTGTTTTTACAGCTTCTGTGTTGCTAATAAGGATGAGATGAGTACGCAATCTGTGAGAGATTAAGCCGCTTTTTTACCG  
AAAGCACTTACATTGTGCGTGAAGGAGACCCCGTTAACGAAATGATGTTTCAATCCGAGGCCGGTTAGAAAGTGAACAACAGATGGG  
GGAAGAAGCGGTTTTCTTCAACAGAGGGTTGTTAAAAGAGGAGACTTTTGTGGTGAAGAGCTTCTGACATGGCTCTTGACCCTAAAGC  
AGGCTCAAACCTACCTTCTTCCACAAGAACAGTGAAGGCTCTGACTGAAGTAGAGGCTTTCGCTCTTGAAGCTGAAGAGCTGAAGTTTTG  
TAGCAAGTACAGTTTAGGAGACTCAGTATGTCAGAGGTTCAACAACACTTAAAGTTTTACTCTCAGCAATGGAGACTTGGGCTTTTCC  
TTCATCCAAGCTGCTTGGCGTCTGCTATCAAGAAGGAAAACGCTGAATGAGACGGATTGAAGAAAAGAAGAAGATTTGGTTATGA  
AGATGAATATGATGATGAGAGTACAAGAGCCATGTTTATCACAAGAAGTGAAGTCTTCTTCTAGACTGCGTTCAACGATATTTGCAT  
CAAGATTTGCTGCTAATGCATTTGAAGGGCACAGACTTAGGAGCTCAGAGAGTTCAAGACCTTGATAAATCTGCAAAAGCCCTCCGGAA  
CCTGTTTTTCAAGGCGGTAATGAGGCTTGGCGGGTTCGCGGAGTACTTAGTGAATTCGCGGCGCGGGGCGGCTGGAGCCACCCGCA  
GTTCCGAAAATGAGAGCTCGAATTTCCCGCATCGTTCAAACATTTGGCAATAAAGTTTTCTTAAAGATTGAATCCTGTTGCCGCTTGGC  
ATGATATCATATAAATTTCTGTGAATACGTTAAGCATGTAATAATTAACATGTAATGCATGACGTTATTTATGAGATGGGTTTTTAT  
GATTAGAGTCCCGCAATTAACATTTAATACGCGATAGAAAACAAAATATAGCGCGCAAACTAGGATAAATTTATCGCGCGCGGTGTCAT  
CTATGTTTACAGTACGGGAATTCAGCTTTTGTTCCTTTAGTGAAGGTTAATTCAGGCTTGGCGTAATCAGGCTATAGCTTTTCCCT  
GTGTGAATTTGTTATCCGCTCACAAATCCACACAACATACGAGCCGGAAGHCATAAAGTGTAAAGCCGCGGTTGCTAATGAGTGAAGCT  
AACTCACATTAATGCGTTCGCTCACGCCCCCTTTCCAGTCGGGAAACCTGTCGTGCCAGCTGCATTAATGAATCGGCCAACCGCGG  
GGGAGAGCGGTTTTGCGTATTGGGCGCTTCCGCTTCTCGCTCAGTCTGCTGCGCTCGGTCGTTCCGGTTCGCGCGAGCGGTTATC  
GCTCAGTCAAAGGCGGTAATACGCTTATCCAGAAATCAGGAGATAACCGAGGAAAGAACATGAAGCCGTTGACAGGATATATTGGCG  
GGTAAACTAAGTCGCTGTATGTGTTTGTGAGATCTCATGTGAGCAAAAGGCCAGCAAAAGGCCAGGAAACCGTAAAAAGCCCGCTTG  
CTGGCGTTTTCCATAGGCTCCGCCCCCTGACGAGCATCACAAAATCGACGCTCAAGTCAGAGGTTGGCGAAACCCGACAGACTATA  
AAGATACCAGGCGTTTTCCCGTGAAGCTCCCTCGTGCCTCTCTGTTCCGACCCTGCCGCTTACCGGATACCTGTCCGCTTTCTCC  
CTTCGGGAAGCGTGGCGCTTTCTCATAGCTCACGCTGTAGGTTATCTCAGTTTCGTTGAGTTCGTTCCGTTCCAGCTTCCGCTTCCGCT  
GAACCCCGCTTACGCCGACCGCTGCGCCTTATCCGGTAACTATCGTCTTGTAGTCCAAACCCGGTAAGACACGACTTATCGCCACTGGC  
AGCAGCCACTGGTAACAGGATTAGCAGAGCGAGGTATGATAGCGGTTGCTACAGAGTTCTTGAAGTGGTGGCTAACTACGGCTACACTA  
GAAGAACAGTATTTGGTATCTGCGCTCTGCTGAAGCCAGTTACCTTCGGAAGAAGAGTTGGTAGCTCTTGATCCGGCAAAACAAACC  
GCTGGTAGCGGTTGGTTTTTTGTTGCAAGCAGCAGATTACCGCGCAGAAAAAAGGATCTCAAGAAGATCCTTTGATCTTTTTCTACGGG  
GTCTGACGCTCAGTGGAACGAAAACCTCACGTTAAGGGATTTTGGTCTAGGATTATCAAAAAGGATCTTCCACTAGATCCTTTTAAAT  
AAAAATGAAGTTTTAAATCAATCTAAAGTATATATGTGTAACATTTGGTCTAGTATTAGAAAACTCATCGAGCATCAATGAAACTGC  
AATTTATTCATATCAGGATTAATCAATACCATATTTTTGAAAAAGCCGTTTTCTGTAATGAAGGAGAAAACCTACCCGAGGCAAGTCCATAG  
GATGGCAAGATCCTGGTATCCGGTCTGGATCCGACTCGTCCAACATCAATACAACCTATTAATTTCCCTCGTCAAAAATAAGGTTAT  
CAAGTGAGAAATCACCATGAGTACGACTGAATCCGGTGAGAAATGGCAAAAGTTTATGCATTTCTTTCCAGACTTGTCAACAGGCCAG  
CCATTACGCTCGTCATCAAAATCACTCGCATCAACCAACCCGTTATTTCATTCTGATTGCGCCTGAGCGAGACGAAATACGGATCGCT  
GTTAAAAGGACAATTACAAACGGAATCGAATGCAACCGCGCGAGGAACACTGCCAGCGCATCAACAATATTTTACCTGAATCAGGAT  
ATTTCTTAATACCTGGAACTGCTTTTTTCCCTGGGATCGCAGTGGTGAATACCATGCATCATCAGGATACGGAATAAATGTTGATG  
CTCGGAAGAGGCATAAATTCGCTCAGCCAGTTTAGTCTGACCATCTCATCTGTAACAACATTGGCAACGCTACCTTTGCCATGTTTCAG  
AAACAACCTGCGCATCGGGCTTCCATACAATCGGTAGATTGTCGCACTGATTGCCGACATTTATCGCGAGCCATTTATACCCAT  
ATAAATCAGCATCCATGTTGGAATTTAATCGCGGCTTGAGCAAGACGTTTTCCCGTTGAATATGGCTCATAACACCCCTTGTATTACTG  
TTTATGTAAGCAGACAGTTTTTATGTTTATGATATATTTTTTACTTGTGCAATGTAACATCAGAGATTTCTGGAGACACAACGTTGGCT  
TTGTTGAATAAATCGAACTTTTCTGAGTGAAGATCAGATCGCATCTTCCCGACAACGCAAGCCGTTCCGAGGAAAGCAAAAGT  
TCAAAATCACAACCTGGTCCACCTACAACAAGCTCTCATCAACCGTGGCTCCCTCACTTTCTGGCTGGATGATGGGCGATTACGGCG  
ATCCCATCCAACAGCCCGCGCTGAGCGGGCT
